# Oxalate and oxalotrophy: an environmental perspective

Don A. Cowan<sup>1,\*</sup>, Darya Babenko<sup>2</sup>, Ryan Bird<sup>3</sup>, Alf Botha<sup>2</sup>, Daniel O. Breecker<sup>4</sup>, Cathy E. Clarke<sup>5</sup>, Michele L. Francis<sup>5</sup>, Tim Gallagher<sup>6</sup>, Pedro H. Lebre<sup>1</sup>, Teneille Nel<sup>5</sup>, Alastair J. Potts<sup>7</sup>, Marla Trindade<sup>3</sup>, Lonnie Van Zyl<sup>3</sup>

<sup>1</sup>Centre for Microbial Ecology and Genomics, Department of Biochemistry, Genetics and Microbiology, University of Pretoria, Pretoria 0002, South Africa

<sup>2</sup>Department of Microbiology, University of Stellenbosch, Stellenbosch 7602, South Africa

<sup>3</sup>Institute for Microbial Biotechnology and Metagenomics, Department of Biotechnology, University of the Western Cape, Cape Town 7535, South Africa

<sup>4</sup>Department of Earth and Planetary Science, the University of Texas at Austin, Austin, TX 78712-1692, United States

<sup>5</sup>Department of Soil Science, University of Stellenbosch, Stellenbosch 7602, South Africa

<sup>6</sup>Department of Earth Sciences, Kent State University, Kent, OH 44240, United States

<sup>7</sup>Botany Department, Nelson Mandela University, Gqeberha 6019, South Africa

\*Corresponding author. University of Pretoria, South Africa. E-mail: [don.cowan@up.ac.za](mailto:don.cowan@up.ac.za)

## Abstract

Oxalic acid is one of the most abundant organic acids produced by plants. Much of the global production of oxalic acid is deposited on soil surfaces in leaf litter to be oxidized by microorganisms, resulting in a pH increase and shifting the carbonate equilibria. In what is known as the oxalate-carbonate pathway, calcium oxalate metabolism results in CO<sub>2</sub> being sequestered into soils as insoluble calcite (CaCO<sub>3</sub>). There is a growing appreciation that the global scale of this process is sufficiently large to be an important contribution to global carbon turnover budgets. The microbiomics, genetics, and enzymology of oxalotrophy are all soundly established, although a more detailed understanding of the landscape-scale kinetics of the process would be needed to incorporate oxalotrophy as an element of process models informing the relevant Sustainable Development Goals. Here, we review the current state of knowledge of oxalotrophs and oxalotrophy and the role they play in terrestrial ecosystem services and functions in terms of carbon sequestration and nutrient cycling. We emphasize the relevance of these to the Sustainability Development Goals (SDGs) and highlight the importance of recognizing oxalotrophy, when accounting for the natural capital value of an ecosystem.

**Sustainability statement:** This review, Oxalate and oxalotrophy: an environmental perspective, addresses the impact of oxalate and oxalotrophy on the United Nations Sustainable Development Goals. Oxalates are common constituents of plant tissues. However, the environmental impact of these chemical constituents is principally derived from their decomposition by soil microorganisms, with the release of CO<sub>2</sub> and stimulation of the oxalate-carbonate pathway and associated soil pH changes. These processes result in improved soil structure and quality with positive impacts on land and agriculture (Goals 2, 15), contribute directly to carbon sequestration (Goal 13), and contribute indirectly, through local and global effects, to other SDGs including Goal 3 (good health and wellbeing) and Goal 14 (life below water).

**Keywords:** oxalate, oxalotrophy, oxalate-carbonate pathway (OCP), carbon sequestration, natural capital, nature based solutions

## Introduction

In the early 21st Century, we are witness to rates of biodiversity loss and ecosystem deterioration coupled with a rate of climate change that are unprecedented in human history (IPBES 2019, Fischer et al. 2021, Duffenbaugh et al. 2023). To combat a legacy of environmental destruction that is one of the defining characteristics of the Anthropocene (Folke et al. 2021), the Kunming-Montreal Global Biodiversity Framework was established in December 2022 at the 15th meeting of the Conference of Parties to the UN Convention on Biological Diversity (COP 15 2022). This framework identifies biodiversity as an important element in fighting climate change, poverty, and providing food security. The protection of biodiversity is understood to be critical in achieving many of the UN Sustainable Development Goals (SDGs) declared in the 2030 Agenda for Sustainable Development (UN General Assembly 2015), and remains an urgent priority (Sachs et al. 2023).

A vital future objective is the identification of ecosystems that contribute most to achievement of the SDGs and climate targets. The financial viability of Agriculture, Forestry, and

Other Land Use (AFOLU) projects requires a cost analysis to be undertaken, based on the alternative land uses identified in the project's assessment (Verra 2019). A major issue with this approach is that ecosystem services are not accounted for, such that the true impact of a land use change cannot be valued or compared to alternatives. Without understanding the true value of ecosystem services, strategic decisions on ecosystem management, protection, or rejuvenation, designed to help achieve the SDGs (Sachs et al. 2023) may not necessarily be focused on the ecosystems that would offer the greatest return.

An ecosystem service that is not currently recognized for its value is oxalotrophy (the ability of organisms to use oxalate as a carbon and energy source: Kost et al. 2013). Microbial energy cycles that involve carbon-cycling are now recognized as being highly influential in the provision and regulation of ecosystem services. Oxalate salts, oxalic acid, and oxalogenic plants are widespread across the terrestrial world. The capacity for oxalotrophy, once thought to be a rare bacterial trait, is now believed to be widespread in prokaryotes

Received 10 October 2023; revised 18 December 2023; accepted 20 December 2023

© The Author(s) 2024. Published by Oxford University Press on behalf of Applied Microbiology International. This is an Open Access article distributed under the terms of the Creative Commons Attribution License (<https://creativecommons.org/licenses/by/4.0/>), which permits unrestricted reuse, distribution, and reproduction in any medium, provided the original work is properly cited.

and lower eukaryotes, and is found extensively in terrestrial ecosystems, plant-associated microbiomes and animal digestive tracts (Hervé et al. 2016).

The critical ecosystem service of oxalotrophy is related to the oxalate-carbonate pathway (Aragno and Verrecchia 2012, Palmieri et al. 2019), where CO<sub>2</sub> is sequestered as insoluble carbonates in soils (Verrecchia 1990). In this pathway, oxalotrophic bacteria and fungi are able to decompose calcium oxalate in leaf litter and soil organic matter, forming CaCO<sub>3</sub> in the process due to a local rise in pH (Pons et al. 2018, Uren 2018, Hervé et al. 2021). While there is a growing understanding of the scale and significance of this process, its importance in global ecosystem servicing is to date only poorly understood. Understanding the interactions between oxalogenic plants, saprophytic decomposers, and/or oxalotrophic microorganisms in pristine and agricultural soils is crucial to exploit this naturally occurring carbon capture process and possibly for the future engineering of carbon sequestration in drylands.

In this review and for the sake of brevity, we focus largely on oxalotrophic processes in terrestrial ecosystems. Related and equally important topics such as oxalogenesis (Palmieri et al. 2019) and the role of oxalate in a human clinical context (Galan-Llopis et al. 2023) have been recently and comprehensively reviewed.

## Oxalate salts and oxalic acid in the environment

Oxalic acid (C<sub>2</sub>H<sub>2</sub>O<sub>4</sub>) is one of the most common and important organic acids produced by plants and soil microorganisms in terrestrial ecosystems (Chen and Liao 2016). The salt of its conjugate base, oxalate, is also highly abundant, with calcium oxalate being the most common oxalate species in the environment (Gadd et al. 2014) and the most abundant organic biomineral found in terrestrial ecosystems (Baran and Monje 2008). Calcium oxalate includes mineral forms whewellite (monohydrate) and weddellite (dihydrate) (Verrecchia et al. 1993), collectively called CaOx hereafter. Other common oxalate salts found in plants and soils include magnesium oxalate (glushinskite) and highly soluble sodium and potassium oxalate species.

## Sources of oxalates

The two main sources of oxalates in terrestrial environments are plants and fungi (Cailleau et al. 2011, Martin et al. 2012, Parsons et al. 2022, Sonke and Trembath-Reichert 2023). There is little evidence of oxalogenesis in bacteria or archaea, with only a handful of reports on the process in specific *Bacillota* (previously Firmicutes): *Burkholderia* and *Pseudomonas* genera (Hamel et al. 1999, Nakata and He 2010, Nakata 2011). While more research on prokaryotic oxalogenesis is undoubtedly required, the current consensus is that plants and fungi are the primary contributors to environmental oxalate pools (Cailleau et al. 2011, Martin et al. 2012).

## Oxalates in plants

Oxalate/oxalic acid production in plants is common and serves several roles, including (i) the sequestration of excess Ca within plant tissues (Nakata 2003), (ii) the detoxification of phytotoxic metals both in the soil and in the plant (Ma et al. 2001), (iii) light regulation (Franceschi 2001), and (iv)

protection against herbivory (Franceschi and Nakata 2005). Recently, the formation of CaOx has been linked to a drought adaptation in plants, providing a CO<sub>2</sub> source during stomatal closure (Tooulakou et al. 2016). Such a drought adaptation would explain the strong negative correlation ( $r = -0.79$ ) found between mean annual rainfall and percentage of plant species containing CaOx crystals (Karabourniotis et al. 2020) as well as the extreme accumulations of CaOx (ca. 100 kg in some cacti) in desert plants (Garvie 2006).

## Oxalates in soils

Oxalates are introduced into soils by root exudation, the microbial decomposition of plant litter, or via biosynthesis by soil fungi (Arnott 1995, Shimada et al. 1997, Jarosz-Wilkolazka and Grząd 2006, Verrecchia et al. 2006, Gadd et al. 2014, Hervé et al. 2021). Oxalates are often released by plants as a stress response in conditions of low nutrient availability or elevated levels of toxic metals (Adeleke et al. 2017). Acidic soils impose both the stress of low plant-available phosphorus (P) and phytotoxic aluminium (Al) concentrations. One of the key adaptation mechanisms for plants growing in acid soils is the production of oxalic acid either from the plant root itself or through the symbiotic relationship with mycorrhizal fungi (Dutton and Evans 1996; Ma et al. 1997, 2001; Gadd 2004, Fomina et al. 2005, Zhang et al. 2014). The chelation capacity of released oxalate reduces the phytotoxicity of Al while releasing phosphate sorbed to Fe and Al oxide surfaces. Oxalic acid production is also stimulated by ectomycorrhizal fungi in high pH environments where availability of P is reduced by interactions with calcite (Arvieu et al. 2003).

## Oxalates in fungi

Oxalic acid production by fungi is influenced by multiple environmental factors, such as available carbon and nitrogen sources, presence of metal oxalates, and pH (Grząd et al. 2009, Guggiari et al. 2011, Martin et al. 2012). Mycorrhizal and saprophytic fungi in soils are known to increase environmental oxalate reserves (Arvieu et al. 2003, Palmieri et al. 2019): these free-living, pathogenic, or plant symbiotic fungi either biosynthesize oxalic acid and excrete it into the environment or increase environmental oxalate levels by breaking down oxalate-rich plant matter and releasing the CaOx idoblasts into the surroundings (Gadd 2004; Verrecchia et al. 2006). In addition to nutrient provision and metal detoxification, the role of oxalic acid in fungi has been linked to pathogenicity (Williams et al. 2011, Vylkova 2017), competition (Gadd 2007, Lehner et al. 2008, Plassard et al. 2009), regulation of bacterial-fungal interactions (Deveau et al. 2018) and wood degradation (Shimada et al. 1997, Guggiari et al. 2011, Hatakka and Hammel 2011). CaOx crystals are closely associated with fungal hyphae (Uren 2018) and may be a by-product of ectomycorrhizal mineral weathering (Schmalenberger et al. 2015). These CaOx crystals, together with CaOx derived from decaying plant material, are the major sources of CaOx in soils (Uren 2018).

Despite the similar solubility of CaOx ( $K_{sp} = 2.7 \times 10^{-9}$ ) and calcite (CaCO<sub>3</sub>;  $K_{sp} = 3.3 \times 10^{-9}$ ) and the even greater solubility of gypsum (CaSO<sub>4</sub>·2H<sub>2</sub>O;  $K_{sp} = 3.1 \times 10^{-5}$ ), the abundance of both calcite and gypsum in soils are much greater than that of CaOx (Uren 2018). The most common CaOx mineral, whewellite, is considered to be thermodynamically stable at ambient conditions (Verrecchia et al. 2006,

Brečević and Kralj 2010) and is not spontaneously oxidized. Thus, it is generally believed that the lower concentrations of CaOx in soils are predominantly related to the metabolic breakdown of CaOx by oxalotrophic microorganisms (Martin et al. 2012, Hervé et al. 2016). While oxalotrophy is likely to be the main factor controlling oxalate concentrations in soils, abiotic factors such as carboxylate sorption (Jones and Edwards 1998, Jones et al. 2003) and oxidation by manganese oxides (Stone 1987, Uren 2018) can also reduce the concentrations of extractable oxalates.

The high turnover rate and low concentrations of CaOx in most soils means it is not easily detected through mineralogical techniques like X-ray diffraction (XRD) (limit of detection 2%–5%). In addition, identification and quantification of oxalate species in soils is not straightforward (Adeleke et al. 2017). These combined factors may have led to the importance of CaOx in biogeochemical cycles being substantially underestimated until recently.

### Detection and quantitation of oxalate species

Techniques to detect and quantify oxalate salts and oxalotrophic activity are essential for an accurate understanding of the effects of oxalotrophy and oxalate dynamics at ecosystem scales. Accurate quantification of oxalate species in soil is challenging due to spatial heterogeneity and temporal variability of organic acids in soils (Jones et al. 2003, Adeleke et al. 2017). CaOx may be identified using a dye stain test, scanning electron microscopy (SEM), infrared (IR) spectroscopy, and XRD (Proia and Brinn 1985, Cailleau et al. 2011, Rojas-Molina et al. 2015, Schmitt et al. 2018, Francis and Poch 2019), but none of these methods are fully quantitative. Chemical analysis of oxalate-containing soils and vegetation typically involves extraction followed by quantitative analysis of oxalate in solution. Acid is used to dissolve sparingly soluble oxalate salts, and CaOx content may be determined by calculating the difference between total and water-soluble oxalate extracted from a sample (Ross et al. 1999, Savage et al. 2000, Xu et al. 2006, Tang et al. 2008, Savage and Mårtensson 2010, Liu et al. 2015, Schmitt et al. 2018). The strengths and limitations of various methods to quantify oxalates in solution, as well as details of limits of detection and quantification, linear ranges, and recovery efficiencies, have been recently reported (Misiewicz et al. 2023).

Enzymatic methods for quantitation of oxalate are based on detection of hydrogen peroxide produced by oxalate degradation using the enzyme oxalate oxidase. However, interference by other compounds in complex sample matrices is a serious limitation of this technique (Hansen et al. 1994, Zuo et al. 2010) and removal of reducing compounds and pH adjustment of samples is usually required (Keevil and Thornton 2006, Sigma-Aldrich Co. 2020). Some assay methods require addition of Ca<sup>2+</sup> to promote oxalate precipitation (Certini et al. 2000, Cailleau et al. 2011, Mujinya et al. 2011, Naik et al. 2014, Liu et al. 2015, Shen et al. 2021), which adds uncertainty to the result if other Ca-bearing minerals are present and/or where Ca<sup>2+</sup> ions need to be quantified.

Indicator methods for detection of oxalates in solution are based on alteration of fluorescence or ultraviolet (UV) radiation absorbance of indicator compounds, often containing copper, nickel, or iron (Holmes and Kennedy 2000, Chamjangali et al. 2006, Zhai et al. 2006, 2007, Tang et al. 2008, Zhai 2008, Chamjangali et al. 2009, Rhaman et al. 2014, Pourreza

et al. 2018, Tavallali et al. 2018, Emami and Mousazadeh 2021, Hontz et al. 2020, Rocha et al. 2020, Shi et al. 2022, Chen et al. 2023). While these approaches are rapid and simple, most demonstrate interference effects by other organic anions. Electrochemical techniques, which are based on conductivity measurements (Holmes and Kennedy 2000, Strobel et al. 2004, Ardakani et al. 2006, Noblitt et al. 2009, Varão Moura et al. 2022, Kotani et al. 2023) are the most sensitive methods for the detection of oxalates in solution, but accuracy is affected by changes in bulk solution conductivity, and high oxalate concentrations cannot be measured accurately.

Liquid chromatography-mass spectroscopy (LC-MS) has shown high sensitivity, accuracy, and selectivity for oxalate analyses (Li et al. 2022, Mu et al. 2022, Misiewicz et al. 2023). However, the instrumentation and expertise required for this method is not necessarily available to all investigators and additional steps may still be necessary to prepare samples with complex matrices (Gómez et al. 2022). Other spectroscopic methods may also hold promise. Raman spectroscopy has been used to measure the ratio of whewellite to weddellite in kidney stones (Khalil and Azooz 2007). Semi-quantitative analysis of oxalic acid on clay surfaces has been achieved by IR spectroscopy (Zhang et al. 2018).

### Detection and quantitation of microbial oxalotrophy

Accurate methods for monitoring oxalate dynamics are essential in studies of the geochemical or biological processing of oxalate in the environment. The potential for oxalotrophy may be implied (but not proven) by the identification of oxalotrophic microorganisms and confirmation of their functional potential. Similarly, the potential capacity for oxalate metabolism can be identified by analysis of the key genes encoding enzymes of the oxalate degradation pathways (*oxc*, *frc*, *oxdC*, and *oxlT*; Sonke and Trembath-Reichert 2023), either by gene-specific PCR or via full genome or metagenome sequencing. While the presence of a single gene in a multi-gene pathway is not, in itself, evidence of active metabolism, the presence of a complete pathway is more definitive, particularly if supported by transcriptomic data (i.e. evidence of active gene expression). The contribution of both fungi and bacteria to oxalate degradation has been confirmed by qPCR analysis of the *frc* gene (Martin et al. 2012).

Quantitation of oxalate degradation provides definitive evidence of oxalotrophy, and has been monitored qualitatively by observation of the dissolution of oxalate salts around growing microbial colonies (Braissant et al. 2002, 2004). Oxalotrophic bacterial activity has also been monitored by isothermal microcalorimetry (Bravo et al. 2011). Oxalate degradation in microbial cultures may be monitored quantitatively by measuring depletion of oxalate in the medium by chemical analytical methods (Ström et al. 2001, van Hees et al. 2002, Daniel et al. 2007, Fujii et al. 2013, Dauer and Perakis 2014). This allows determination of oxalate mineralization rates (Ström et al. 2001, van Hees et al. 2002, Van Hees et al. 2005).

Alkalinity is arguably the most easily-measured fermentation parameter but is completely nonselective. Bicarbonate ions are produced as a by-product of oxalate oxidation and thus an increase in solution pH may be considered, under very specific fermentation conditions, as confirmation of oxalotrophic activity (Braissant et al. 2002, 2004; Cailleau et al.



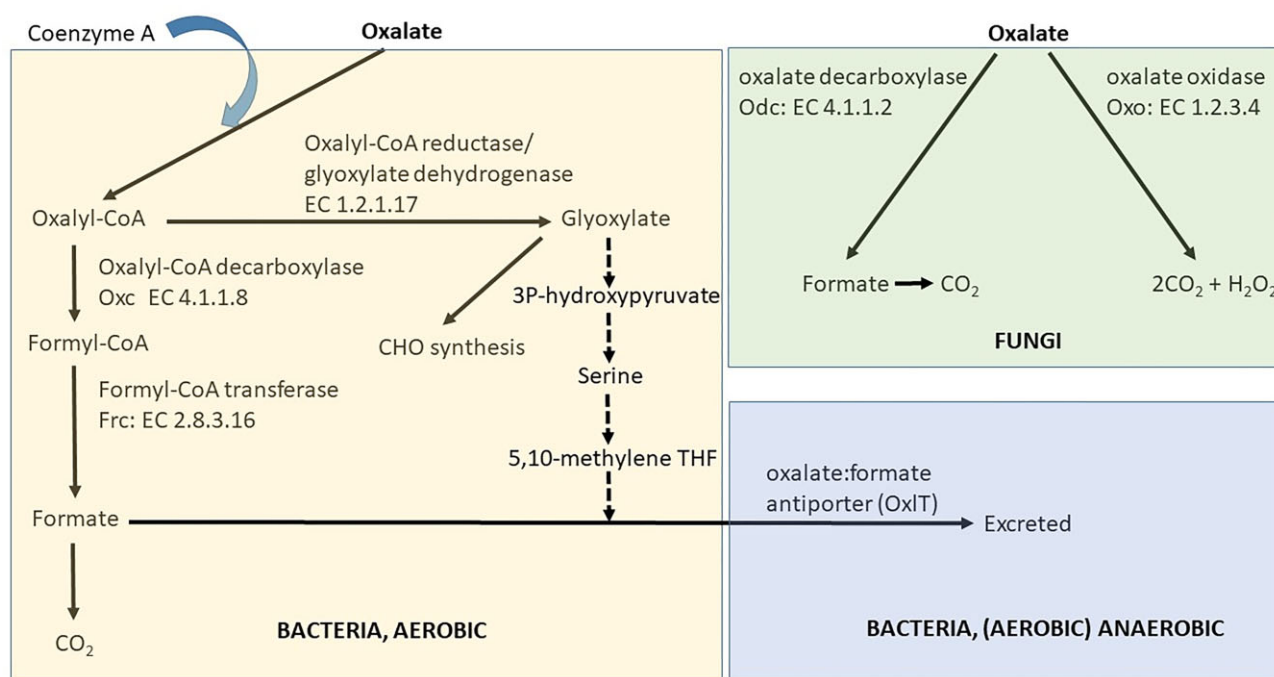

**Figure 1.** Diagrammatic summary of the principal oxalotrophic pathways, intermediates and enzymes (adapted from Palmieri et al. 2019, Robertson and Meyers 2022, Sonke and Trembath-Reichert 2023).

2011, 2014; Martin et al. 2012, Rowley et al. 2017, Gatz-Miller et al. 2022).

Mineralogical and petrographic studies have proved useful in the identification of oxalate transformation processes and in constructing biogeochemical models of oxalate processing pathways (Verrecchia and Dumont 1996, Cailleau et al. 2011). Mineral substrates and products of oxalotrophy may be identified and micromorphologically described by use of techniques such as X-ray fluorescence microscopy (XFM), XRD, SEM, and optical microscopy (Braissant et al. 2004, Garvie 2006, Cailleau et al. 2011, Bonazza et al. 2015, Francis and Poch 2019, Parsons et al. 2022).

A novel approach for detecting and perhaps quantifying oxalotrophy involves determination of the respiratory quotient (RQ). RQ is the number of moles of CO<sub>2</sub> produced per mole of O<sub>2</sub> consumed during respiration (Dilly 2001). This quotient is, in part, controlled by the oxidation state of carbon in the substrate. The oxidation state of carbon is much higher in oxalate (+3) than in carbohydrates (0), making the RQ for oxalate oxidation (4) much larger than the RQ of aerobic respiration involving carbohydrate oxidation (1) and most other organic substrates (+0.7–+1.3) (Masiello et al. 2008). Therefore, determinations of RQ from measurements of CO<sub>2</sub> and O<sub>2</sub> concentrations in the headspace of incubation vessels and the air-filled pore spaces of soils (e.g. Gallagher and Breecker 2020, Hicks Pries et al. 2020), although not yet to our knowledge applied for this purpose, may enable nondestructive monitoring of oxalotrophy.

## The biochemistry and genetics of oxalotrophy

### Genes, pathways, and enzymes

The capacity for oxalotrophy is widespread in both prokaryotes and lower eukaryotes, and can occur both aerobically

and anaerobically (Fig. 1). In bacteria, aerobic oxidation of oxalate occurs via a CoA-dependent activation to oxalyl-CoA, which is either decarboxylated by oxalyl-CoA decarboxylase [Oxc: EC 4.1.1.8] with subsequent formyl-CoA transferase (Frc: EC2.8.3.16)-catalyzed CoA removal to generate formate (for subsequent oxidation to CO<sub>2</sub>) or converted to glyoxylate by oxalyl-CoA reductase [glyoxylate dehydrogenase: EC 1.2.1.17] for subsequent carbohydrate synthesis via the glycine/serine pathways or energy production via the TCA cycle. Under anaerobic conditions, the primary oxidation product, formate, is excreted from the cell via an oxalate: formate antiporter (OxIT), with the associated H<sup>+</sup>-dependent membrane polarization driving APT synthase activity.

An alternative pathway for aerobic oxalate catabolism, where oxalate is indirectly converted to formate via the glycolate pathway and the use of a C1 tetrahydrofolate intermediate, has been recently proposed (Robertson and Meyers 2022). Formate may be oxidised to CO<sub>2</sub> with the synthesis of NADH or excreted via an oxalate-formate antiporter, hitherto only implicated in anaerobic oxalate metabolism. This pathway (Fig. 1), which may be specific to the actinobacterial genus *Kribbella*, does not contain the first accepted oxalotrophic marker enzyme gene (*oxc*). Although the gene *frc* is present in some of the oxalotrophic *Kribbella* species, it is not thought to play any role in the proposed oxalotrophy pathway for this genus.

In fungi and other lower eukaryotes, oxalate is oxidized by two enzymes: oxalate decarboxylase [OdcC: EC 4.1.1.2] and oxalate oxidase [Oxo: EC 1.2.3.4]. The detailed enzymology of these pathways has been comprehensively reviewed by Palmieri et al. (2019).

The key genes for oxalotrophy (*oxc*, *frc*, *odc*, and *oxo*), together with the oxalate-formate antiporter gene (*oxIT*) are widely used as markers for identification of (putative)

oxalotrophic microbial taxa (Sonke and Trembath-Reichert 2023). Such approaches have the potential to identify both novel oxalotrophic taxa and novel oxalotrophic environments, although the discovery that alternative pathways (Robertson and Meyers 2022), which do not use the oxalyl-CoA decarboxylase/formyl-CoA transferase pathway highlights the weaknesses of marker-specific functional surveys. Furthermore, enzyme substrate-promiscuity implicates other enzymes in fulfilling the role of the oxalyl-CoA reductase, demonstrated in *Kribbella* spp. (Robertson and Meyers 2022) and in *Methylobacterium extorquens* (Scheider et al. 2012). It is therefore clear that estimations of the diversity and capacity of oxalotrophy will inevitably be underestimated using *oxc* and *frc* surveys.

A recent multilocus survey of multiple metagenome sequence datasets, including high quality Metagenome Assembled Genomes (MAGs), suggested that microbial oxalotrophy is widespread in marine habitats, and may be an important trophic strategy in marine sediments (Sonke and Trembath-Reichert 2023).

The genetic basis of oxalotrophy (i.e. gene organisation, gene copies and the effect of biotic and abiotic factors on the regulation of expression) has not been widely investigated and has only been described for a few bacterial models. For example, the *oxc* and *frc* genes have been shown to be transcribed as an operon in lactic acid bacteria and in *E. coli* (Federici et al. 2004, Azcarate-Peril et al. 2006, Lewanika et al. 2007). A more recent study by Jiang et al. (2020) showed that the two marker genes form an operon in a broad range of species, although some operons also include a third gene encoding a transporter protein (e.g. in *Escherichia coli* G3/10) or a CoA:oxalate CoA-transferase (e.g. in *Acetobacter pasteurianus*). By contrast, in *Oxalobacter formigenes* the genes have independent promoters and are located several kilobases apart on the genome (Sidhu et al. 1997).

The regulation of expression of these marker genes has also been understudied, although environmental pH has been identified as an important regulator of microbial oxalate gene expression. For instance, in *Bifidobacterium animalis* *oxc* gene expression is upregulated by a pH increase from 4.5 to 6.5 (Turroni et al. 2010), whereas in *Lactobacillus acidophilus* this increase occurred between pHs 4.5 to 5.5 but was reduced at a pH of 6.8 (Azcarate-Peril et al. 2006).

## Microbiology of oxalotrophs

### Bacterial oxalotrophy

Culture-dependent studies of oxalotrophy have underpinned our understanding of the microbiology and biochemistry of the oxalotrophic process. Some oxalotrophic bacteria are completely dependent on oxalic acid as a carbon source and energy (“specialist” oxalotrophs), whereas others can utilize oxalic acid in addition to other carbon sources (“generalist” oxalotrophs) (Sahin 2003). Based on culture-dependent studies, the capacity for bacterial oxalotrophy is not distributed across all taxa, and was initially considered as a rare trait attributed to cultured representatives of the *Actinomycetota* (previously *Actinobacteria*), *Bacillota*, and *Pseudomonadota* (previously *Proteobacteria*) phyla, predominantly from terrestrial ecosystems (e.g. soil, freshwater sediments, plants, gut habitats, and other host-associations) (Table 1) (Hervé et al. 2016, Robertson and Meyers 2022). The recent application

of metagenomic analyses has extended this capacity to the *Bacteroidota* (previously *Bacteroidetes*) (Tanca et al. 2017) and to marine environments (Sonke and Trembath-Reichert 2023), highlighting the likelihood that many more taxa may contribute to oxalotrophic carbon cycling than generally thought.

Due to the critical role that bacteria play in oxalate-carbonate pathway processes in natural ecosystems, the detection, identification, and characterization of these microorganisms are essential for understanding their contribution to ecosystem functioning. Although culturable bacteria only represent a small percentage of the total population, culture-based studies provide critical, and unique datasets, such as process kinetics and interorganismal interactions, that contribute to our understanding of the role of microorganisms in the oxalate-carbonate pathway. For example, cultivation studies have led to the suggestion that certain *Insecta* hosts actively recruit bacteria capable of degrading oxalic acid in order to minimize oxalate toxicity (Kikuchi et al. 2005, Compant et al. 2008, Itoh et al. 2014, Maddaloni and Pascual 2015, Tago et al. 2015). Similarly, plant rhizosphere function has been shown to be highly dependent on *Burkholderia* spp. oxalotrophy (Kost et al. 2014).

Culture-dependent studies of oxalotrophs have primarily focused on enumeration and taxonomy, particularly via the use of selective growth media (Table 1), generally employing solid media containing CaOx as a sole carbon source (Khammar et al. 2009, Bravo et al. 2011, Cailleau et al. 2014, Sun et al. 2019). Potassium, sodium, and ammonium oxalate salts have also been successful in culturing oxalotrophs, and are consumed at similar rates to CaOx (Tamer and Aragno 1980, Tamer 1982, Campieri et al. 2001, Sahin et al. 2002, Bravo et al. 2015, Robertson and Meyers 2022). *Kribbella* spp. are an exception, being inhibited by sodium oxalate but capable of metabolising CaOx very rapidly (Robertson and Meyers 2022). Despite the use of traditional cultivation techniques being limited to only a handful of media, the diversity of culturable oxalotrophic bacteria is steadily increasing (Table 1) and new species are expected to be found when targeting new environments (Bravo et al. 2015, Sonke and Trembath-Reichert 2023) and/or with refinements in culture media and culturing technologies (Wu et al. 2020).

Almost all growth kinetics and oxalate consumption characterization have been conducted on a few model bacterial strains (Table 1) and very few studies have assessed the ecological role of cultivable oxalotrophic bacteria. Due to the high oxidation state of oxalate, bacterial growth rates on oxalate as a sole carbon source are generally low (Braissant et al. 2002), and the relationship between bacterial growth and oxalate degradation is species-dependent (Campieri et al. 2001, Bravo et al. 2015). An apparent decoupling between cell growth and oxalate consumption suggests that not all strains use oxalate solely for biomass production.

The highest oxalate consumption rates for soil oxalotrophs are recorded for *Pseudomonadota* species. *Cupriavidus oxalaticus* (generalist) and *C. necator* (specialist) consumed calcium and potassium oxalate at rates greater than 0.6  $\mu\text{M h}^{-1}$  and 0.4  $\mu\text{M h}^{-1}$ , respectively (Bravo et al. 2011). *Variovorax soli* C18 consumed potassium oxalate at a rate of 0.24  $\mu\text{M h}^{-1}$  (Bravo et al. 2015). Members of the *Actinomycetota* also demonstrated comparable consumption rates (up to 0.29  $\mu\text{M h}^{-1}$ ) (Bravo et al. 2011, 2015).

**Table 1.** Inventory of cultured oxalotrophic bacteria and fungi and methods used to detect and measure oxalotrophic activity.

| Taxa                              | Source                                     | Oxalotrophy detection method                                  | Oxalate utilization                                         | References                                    |
|-----------------------------------|--------------------------------------------|---------------------------------------------------------------|-------------------------------------------------------------|-----------------------------------------------|
| Bacteria                          |                                            |                                                               |                                                             |                                               |
| <i>Pseudomonadota</i>             |                                            |                                                               |                                                             |                                               |
| <i>Achromobacter</i> spp.         | Soil                                       | Degradation halo on media with CaOx as the sole C-source      |                                                             | Bravo et al. 2015                             |
| <i>Acinetobacter baylyi</i>       | Leaves                                     | Degradation halo on media with KOx as the sole C-source       |                                                             | Ghate et al. 2021                             |
| <i>A. calcoaceticus</i>           | Soil                                       | Growth with Ox as the sole C-source                           |                                                             | Paul et al. 2010                              |
| <i>Acinetobacter</i> sp.          | Soil                                       | Degradation halo on media with CaOx as the sole C-source      |                                                             | Bravo et al. 2015                             |
| <i>Afiptia carboxidoorans</i>     | Soil                                       | Positive oxalate assimilation test                            |                                                             | De Lajudie et al. 1994                        |
| <i>Afiptia</i> sp.                | Soil                                       | Degradation halo on media with CaOx as the sole C-source      | 0.209 $\mu\text{mol/h}$ , Isothermal microcalorimetry (IMC) | Sahin et al. 2002, Bravo et al. 2015          |
| <i>Agrobacterium bu.1</i>         | Tropical legumes                           |                                                               |                                                             |                                               |
| <i>Agrobacterium</i> sp.          | Soil, rhizospheres, plant stem tissue      | Growth with CaOx as the sole C-source                         |                                                             | Jenni et al. 1988                             |
| <i>Aminobacter carboxidus</i>     | Soil                                       | Degradation halo with CaOx as the sole C-source               |                                                             | Sahin et al. 2002                             |
| <i>Ancylobacter</i> sp.           | Soil, rhizospheres, plant stem tissue      | Growth with KOx as the sole C-source                          |                                                             | Lang et al. 2008                              |
| <i>Ancylobacter</i> spp.          | Soil                                       | Growth in Oxalate-enrichment culture                          |                                                             | Weber et al. 1999, Sahin et al. 2002          |
| <i>Azospirillum brasilense</i>    | Tropical plants                            |                                                               |                                                             |                                               |
| <i>Azorhizobium oxalatiphilum</i> | Plant                                      | Growth in Oxalate-enrichment culture                          |                                                             | Lang et al. 2013                              |
| <i>Beijerinckia indica</i>        | Soil                                       | Growth with oxalate as the sole C-source                      |                                                             | Becking 1984, Tamas et al. 2010               |
| <i>Bradyrhizobium japonicum</i>   | Legume root nodules                        | Degradation of CaOx/NaOx in liquid media as the sole C-source |                                                             | Koch et al. 2014                              |
| <i>Burkholderia</i> sp.           | Soil, rhizospheres, plant stem tissue      | Degradation halo with CaOx as the sole C-source               |                                                             | Sahin et al. 2002                             |
| <i>Burkholderia</i> spp.          | Surface of <i>Varroa destructor</i>        | Growth with CaOx as the sole C-source                         |                                                             | Maddaloni and Pascual 2015                    |
| <i>Burkholderia</i> spp.          | Plant                                      | Degradation halo on media with CaOx as the sole C-source      |                                                             | Kost et al. 2014                              |
| <i>Cupriavidus</i> sp.            | Soil                                       | Degradation halo on media with CaOx as the sole C-source      |                                                             | Bravo et al. 2015                             |
| <i>Cupriavidus oxalaticus</i>     | Soil, intestinal tract of Indian earthworm | IMC measurements in liquid media with KOx                     | 0.66 $\mu\text{mol/h}$ , IMC                                | Khambata and Bhat 1953; Bravo et al. 2013a, b |
| <i>Cupriavidus necator</i>        | Soil, Leaf litter                          | IMC measurements in liquid media with KOx                     | 0.40 $\mu\text{mol/h}$ , IMC                                | Braissant et al. 2002; Bravo et al. 2013a, b  |
| <i>Desulfovibrio vulgaris</i>     | Sediment                                   | Growth with NaOx as sole C-source                             |                                                             | Postgate 1963                                 |
| <i>Enterobacter</i> spp.          | Leaves                                     | Degradation halo with KOx as sole C-source                    |                                                             | Ghate et al. 2021                             |
| <i>Ensifer meliloti</i>           | Legumes                                    | Activity increase with increasing oxalate concentration, IMC  |                                                             | Baaziz et al. 2021                            |
| <i>Ensifer</i> sp.                | Soil                                       | Degradation halo on media with CaOx as sole C-source          |                                                             | Bravo et al. 2015                             |
| <i>Hermimonas glactei</i>         | Soil                                       | Growth with oxalate as sole C-source                          |                                                             | Sahin et al. 2010                             |
| <i>Hermimonas saxosidens</i>      | Lichen-colonized rock                      | Growth with KOx as sole C-source                              |                                                             | Lang et al. 2007                              |

Table 1. Continued

| Taxa                                | Source                           | Oxalotrophy detection method                                                                         | Oxalate utilization                      | References                                                |
|-------------------------------------|----------------------------------|------------------------------------------------------------------------------------------------------|------------------------------------------|-----------------------------------------------------------|
| <i>Hypbomicrobium vulgare</i>       | River water                      | Growth with oxalate as sole C-source                                                                 |                                          | Urakami and Komagata 1987                                 |
| <i>Janthinobacterium</i> spp.       | Subtropical stream               | Growth with NaOx as sole C-source                                                                    |                                          | Lu et al. 2020                                            |
| <i>Lysobacter soli</i>              | Soil                             | Degradation halo on media with CaOx as sole C-source                                                 | 0.221 $\mu\text{mol/h}$ , IMC            | Bravo et al. 2015                                         |
| <i>Lysobacter</i> spp.              | Soil                             | Degradation halo on media with CaOx as sole C-source                                                 |                                          | Bravo et al. 2015                                         |
| <i>Mesorhizobium</i> sp.            | Legumes                          | Growth with Ox as sole C-source                                                                      |                                          | Tan et al. 1999                                           |
| <i>Methylolobium extorquens</i>     | Soil                             | Growth in Oxalate-enrichment culture                                                                 | 0.32 $\mu\text{mol/h}$ , IMC             | Bassalik and Bassalik 1913, Sahin et al. 2002, Bravo 2013 |
| <i>Oxalicibacterium flavum</i>      | Leaf litter                      | Growth with KOx as sole C-source                                                                     |                                          | Tamer et al. 2002                                         |
| <i>Oxalicibacterium solurbis</i>    | Soil                             | Growth with oxalate as sole C-source                                                                 |                                          | Sahin et al. 2010                                         |
| <i>Oxalobacter formigenes</i>       | Mammalian gastrointestinal tract | Degradation halo with CaOx as sole C-source                                                          | 2.9 mmol/min/g cell (dry weight)         | Allison et al. 1985, Daniel et al. 2021                   |
| <i>Oxalobacter vibrioformis</i>     | Freshwater sediment              | Growth with di-ammonium oxalate as sole C-source                                                     |                                          | Dehning and Schink 1989                                   |
| <i>Pandoraea</i> sp.                | Leaf litter                      | Growth with CaOx as sole C-source                                                                    |                                          | Martin et al. 2012                                        |
| <i>Paracoccus alcaliphilus</i>      | Rhizoplane                       | Degradation halo around colonies on media with KOx as sole C-source                                  |                                          | Anbazhagan et al. 2007                                    |
| <i>Pectobacterium carotovorum</i>   | Leaves                           | Degradation halo with KOx as sole C-source                                                           |                                          | Ghate et al. 2021                                         |
| <i>Polaromonas</i> sp.              | Soil                             | Degradation halo on media with CaOx as sole C-source                                                 |                                          | Bravo et al. 2015                                         |
| <i>Providencia rettigeri</i>        | Oxalate consumption              | 5 g/L consumed in 48 h, HPCE                                                                         |                                          | Hokama et al. 2005                                        |
| <i>Pseudomonas</i> sp.              | Soil                             | [ $^{14}\text{C}$ ]-labeled $\text{CO}_2$ respired from dual-labeled [ $^{14}\text{C}$ ]-oxalic acid | 0.0090 $\mu\text{mol/g}$ biomass in 48 h | Morris and Allen 1994                                     |
| <i>Pseudomonas</i> sp.              | Leaves                           | Degradation halo with KOx as sole C-source                                                           |                                          | Ghate et al. 2021                                         |
| <i>Pseudoxanthomonas</i> sp.        | Soil                             | Degradation halo on media with CaOx as sole C-source                                                 |                                          | Bravo et al. 2015                                         |
| <i>Rhizobium huakuii</i>            | Root nodules                     | Positive oxalate assimilation test                                                                   |                                          | De Lajudie et al. 1994                                    |
| <i>Rhodospirillum</i> sp.           | Sediments                        | Growth with Ox as sole C-source                                                                      |                                          | Saleem and Rehman 2019                                    |
| <i>Sphingomonas</i> sp.             | Soil                             | Degradation halo with CaOx as sole C-source                                                          |                                          | Bravo et al. 2013a, b                                     |
| <i>Starkeya novella</i>             | Soil                             | Growth studies in liquid media                                                                       |                                          | Starkey 1935, Chandra and Shetna. 1977                    |
| <i>Stenotrophomonas maltophilia</i> | Soil                             | Degradation halo on media with CaOx as sole C-source                                                 | 0.166 $\mu\text{mol/h}$ , IMC            | Bravo et al. 2015                                         |
| <i>Stenotrophomonas</i> sp.         | Soil                             | Degradation halo on media with CaOx as sole C-source                                                 | 0.074 $\mu\text{mol/h}$ , IMC            | Bravo et al. 2015                                         |
| <i>Stenotrophomonas</i> spp.        | Soil                             | Degradation halo on media with CaOx as sole C-source                                                 |                                          | Bravo et al. 2015                                         |
| <i>Variovorax paradoxus</i>         | Leaf litter                      | Degradation halo around colonies on media with Ox as the C-source                                    |                                          | Tamer and Aragno 1980, Martin et al. 2012                 |
| <i>Variovorax soli</i>              | Soil                             | Degradation halo on media with CaOx as sole C-source                                                 | 0.240 $\mu\text{mol/h}$ , IMC            | Bravo et al. 2015                                         |
| <i>Variovorax</i> sp.               | Soil                             | Degradation halo on media with CaOx as sole C-source                                                 | 0.186 $\mu\text{mol/h}$ , IMC            | Bravo et al. 2015                                         |
| <i>Xanthobacter autotrophicus</i>   | Leaf litter                      | Growth in CaOx enriched liquid media                                                                 | Rapid consumption of oxalate             | Braissant et al. 2002                                     |

Table 1. Continued

| Taxa                                                        | Source                                                | Oxalotrophy detection method                                                                         | Oxalate utilization                                  | References                                             |
|-------------------------------------------------------------|-------------------------------------------------------|------------------------------------------------------------------------------------------------------|------------------------------------------------------|--------------------------------------------------------|
| <i>Xanthobacter</i> sp.                                     | Soil                                                  | Degradation halo with CaOx as sole C-source                                                          |                                                      | Sahin et al. 2002                                      |
| <i>Xanthomonas</i> spp.                                     | Soil                                                  | Degradation halo on media with CaOx as sole C-source                                                 | 0.164 $\mu\text{mol/h}$ , IMC                        | Bravo et al. 2015                                      |
| <i>Bacillota</i><br><i>Ammoniphilus oxalaticus</i>          | Rhizosphere of <i>Rumex acetosa</i> and decaying wood | Growth with $\text{NH}_4\text{Ox}$ as sole C-source                                                  |                                                      | Zaitsev et al. 1998                                    |
| <i>Ammoniphilus oxalativorans</i>                           | Rhizosphere of <i>Rumex acetosa</i> and decaying wood | Growth with $\text{NH}_4\text{Ox}$ as sole C-source                                                  |                                                      | Zaitsev et al. 1998                                    |
| <i>Bacillus licheniformis</i>                               | Soil                                                  | [ $^{14}\text{C}$ ]-labeled $\text{CO}_2$ respired from dual-labeled [ $^{14}\text{C}$ ]-oxalic acid | 0.0039 $\mu\text{mol/g}$ biomass per 48 h            | Morris and Allen 1994                                  |
| <i>Bacillus</i> sp.                                         | Soil                                                  | Degradation halo on media with CaOx as sole C-source                                                 | 0.024 $\mu\text{mol/h}$ , IMC                        | Bravo et al. 2015                                      |
| <i>Clostridium sporogenes</i>                               | Gastrointestinal tract of the white-throated woodrat  | Oxalate degradation assays                                                                           | 18.4%–40.3% removal in 48 h                          | Miller et al. 2014                                     |
| <i>Cohnella phaseoli</i>                                    | Soil                                                  | Degradation halo on media with CaOx as sole C-source                                                 |                                                      | Bravo et al. 2013b                                     |
| <i>Enterococcus gallinarum</i>                              | Gastrointestinal tract of the white-throated woodrat  | Oxalate degradation assays                                                                           | 18.4%–35.5% removal in 48 h                          | Miller et al. 2014                                     |
| <i>Enterococcus faecium</i><br><i>Enterococcus faecalis</i> | Dog faeces<br>Dog faeces/human stool                  | Oxalate degradation, IMC<br>Oxalate degradation, IMC                                                 | 13.2% after 72 h, IMC<br>25.3% after 72 h, IMC       | Ren et al. 2011<br>Hokama et al. 2000, Ren et al. 2011 |
| <i>Lactiplantibacillus plantarum</i>                        | Fermented foods and human stool                       | Oxalate degradation in liquid media                                                                  | 1.4% oxalate degradation in 32 h, Enzymatic assay    | Campieri et al. 2001                                   |
| <i>Lactocaseibacillus casei</i>                             | Dairy products                                        | Oxalate degradation in liquid media                                                                  | >90% oxalate degraded in 5–6 days, Enzymatic assay   | Kwak et al. 2006                                       |
| <i>Lactobacillus gasserii</i> AM63T                         | Human intestine                                       | Oxalate degradation in liquid media                                                                  | 74% oxalate degraded in 5 days, Enzymatic assay      | Lewanika et al. 2007                                   |
| <i>Lactobacillus gasserii</i>                               | Gastrointestinal tract of the white-throated woodrat  | Oxalate degradation assays                                                                           | 14.5%–24.8% removal in 48 h                          | Miller et al. 2014                                     |
| <i>Lactobacillus gasserii</i> .                             | Functional foods; pharmaceutical preparations         | Oxalate degradation in liquid media                                                                  | 35%–100% oxalate degraded in 5 days, Enzymatic assay | Turroni et al. 2007                                    |
| <i>Lactobacillus johnsonii</i>                              | Gastrointestinal tract of the white-throated woodrat  | Oxalate degradation assays                                                                           | 29%–36% removal in 48 h                              | Miller et al. 2014                                     |
| <i>Lactobacillus plantarum</i>                              | Functional foods; pharmaceutical preparations         | Oxalate degradation in liquid media                                                                  | 20%–40% oxalate degraded in 5 days, Enzymatic assay  | Turroni et al. 2007                                    |
| <i>Lactobacillus rhamnosus</i>                              | Functional foods; pharmaceutical preparations         | Oxalate degradation in liquid media                                                                  | 20%–47% oxalate degraded in 5 days, Enzymatic assay  | Turroni et al. 2007                                    |



Table 1. Continued

| Taxa                                                       | Source                                               | Oxalotrophy detection method                         | Oxalate utilization                                            | References                                    |
|------------------------------------------------------------|------------------------------------------------------|------------------------------------------------------|----------------------------------------------------------------|-----------------------------------------------|
| <i>L. acidophilus</i>                                      | Functional foods; pharmaceutical preparations        | Oxalate degradation in liquid media                  | 35–100% oxalate degraded in 5 days, Enzymatic assay            | Turroni et al. 2007                           |
| <i>L. acidophilus</i>                                      | Human stool                                          | Oxalate degradation in liquid media                  | 11.79% oxalate degradation in 25 h, Enzymatic assay            | Campieri et al. 2001                          |
| <i>L. acidophilus</i>                                      | Human stool                                          | Oxalate degradation in liquid media                  | 24% oxalate degraded in 40 h; Enzymatic assay                  | Azcarate-Peril et al. 2006                    |
| <i>Lactobacillus salivarius</i>                            | Functional foods; pharmaceutical preparations        | Oxalate degradation in liquid media                  | 20% oxalate degraded in 5 days, Enzymatic assay                | Turroni et al. 2007                           |
| <i>Lactococcus garvieae</i>                                | Dog faeces                                           | Oxalate degradation, IMC                             | 15.7% removal in 72 h, IMC                                     | Ren et al. 2011                               |
| <i>Levilactobacillus brevis</i>                            | Dairy products                                       | Oxalate degradation in liquid media                  | 0.94% oxalate degradation in 27 h, Enzymatic assay             | Campieri et al. 2001                          |
| <i>Leuconostoc lactis</i>                                  | Dog faeces                                           | Oxalate degradation, IMC                             | 21.8% after 72 h, IMC                                          | Kwak et al. 2006, Ren et al. 2011             |
| <i>Leuconostoc mesenteroides</i>                           | Dog faeces                                           | Oxalate degradation, IMC                             | 14.7% removal in 72 h, IMC                                     | Weese et al. 2004, Ren et al. 2011            |
| <i>Ligilactobacillus animalis</i>                          | Gastrointestinal tract of the white-throated woodrat | Oxalate degradation assays                           | 27.6% removal in 48 h                                          | Miller et al. 2014                            |
| <i>Moorella thermoacetica</i>                              | Horse faeces                                         | Growth studies in oxalate-containing media           | 94% oxalate degradation in 200 h, HPLC                         | Daniel and Drake 1993                         |
| <i>Oxalophagus oxalicus</i>                                | Freshwater sediments                                 | Growth with di-ammonium oxalate as sole C-source     |                                                                | Collins et al. 1994, Dehning and Schink. 1989 |
| <i>Paenibacillus</i> sp.                                   | Soil                                                 | Degradation halo on media with CaOx as sole C-source | 0.117 $\mu$ mol/h, IMC                                         | Bravo et al. 2015                             |
| <i>Psychrobacillus</i> spp.                                | Soil                                                 | Degradation halo on media with CaOx as sole C-source |                                                                | Bravo et al. 2015                             |
| <i>Streptococcus salivarius</i> subsp. <i>thermophilus</i> | Milk                                                 | Oxalate degradation in liquid media                  | 3.06% oxalate degradation in 2.5 h, Enzymatic assay            | Campieri et al. 2001                          |
| <i>Actinomyces</i> sp.                                     | Soil                                                 | Degradation halo on media with CaOx as sole C-source |                                                                | Bravo et al. 2015                             |
| <i>Arthrobacter</i> sp.                                    | Soil                                                 | Degradation halo on media with CaOx as sole C-source |                                                                | Turroni et al. 2010                           |
| <i>Bifidobacterium animalis</i>                            | Human stool/animal faeces                            | Oxalate degradation in liquid media                  | 100% oxalate used after 120 h                                  | Campieri et al. 2001                          |
| <i>Bifidobacterium longum</i> subsp. <i>infantis</i>       | Gastrointestinal tract of human infants              | Oxalate degradation in liquid media                  | 5.26% oxalate degradation in 36 h, Enzymatic assay             | Campieri et al. 2001                          |
| <i>Bifidobacterium</i> spp.                                | Animal/human faeces, probiotic products              | Sodium oxalate degradation in liquid media           | Oxalate-degrading capacity ranging from 1–60%, Enzymatic assay | Federici et al. 2004                          |
| <i>Curtobacterium</i> sp.                                  | Surface of <i>Varroa destructor</i>                  | Growth with CaOx as sole C-source                    |                                                                | Maddaloni and Pascual 2015                    |
| <i>Eggerthella lenta</i>                                   | Human stools                                         | Oxalate degradation in liquid media                  | 1 mg/ml of oxalate removed in 24 h, HPLC                       | Ito et al. 1996                               |
| <i>Kribbella</i> spp.                                      | Soil                                                 | Degradation halo with CaOx or NaOx as sole C-source  |                                                                | Robertson and Meyers 2022                     |
| <i>Lentzea albidocapillata</i>                             | Soil                                                 | Growth studies in oxalate-containing media           |                                                                | Lee et al. 2000, Xie et al. 2002              |
| <i>Lentzea aerocolonigenes</i>                             | Soil                                                 | Growth studies in oxalate-containing media           |                                                                | Xie et al. 2002                               |

Table 1. Continued

| Taxa                                         | Source                | Oxalotrophy detection method                                                                         | Oxalate utilization                                     | References                                |
|----------------------------------------------|-----------------------|------------------------------------------------------------------------------------------------------|---------------------------------------------------------|-------------------------------------------|
| <i>Mycobacterium smegmatis</i>               | Soil/Freshwater       | Growth on malachite green oxalate                                                                    |                                                         | Gordon and Mihm 1959; Wayne & Kubica 1986 |
| <i>Nocardia</i> sp.                          | Soil                  | [ <sup>14</sup> C]-labeled CO <sub>2</sub> respired from dual-labeled [ <sup>14</sup> C]-oxalic acid | 0.0011 μmol/g biomass per 48 h                          | Muller 1950, Morris and Allen 1994        |
| <i>Saccharothrix</i> spp.                    | Soil                  | Growth with Ox as sole C-source                                                                      |                                                         | Labeda et al. 1992                        |
| <i>Streptomyces achromogenes</i>             | Soil                  | Degradation halo on media with CaOx as the C-source                                                  | 0.150 ± 0.009 μmol/h, IMC                               | Bravo et al. 2015                         |
| <i>Streptomyces violaceoruber</i>            | Soil                  | IMC measurements in liquid media with KOx                                                            | 0.29 μmol/h, IMC                                        | Bravo et al. 2011                         |
| <i>Streptomyces</i> sp.                      | Soil                  | Degradation halo with CaOx as sole C-source                                                          | 0.26 μmol/h, IMC                                        | Knutson et al. 1980, Bravo et al. 2015    |
| <i>Terrabacter</i> sp.                       | Soil                  | Degradation halo with CaOx as sole C-source                                                          |                                                         | Bravo et al. 2013a, b                     |
| Fungi                                        |                       |                                                                                                      |                                                         |                                           |
| <i>Ascomycota</i>                            |                       |                                                                                                      |                                                         |                                           |
| <i>Aspergillus niger</i>                     | Culture collection    | CO <sub>2</sub> release from oxalic acid as sole C source                                            | 2.3–12.8 μmoles CO <sub>2</sub> /g dry mycelial/h       | Emiliani and Bekes 1964                   |
| <i>Bartalinia</i> sp.                        | Leaf litter           | Growth with CaOx as sole C-source                                                                    |                                                         | Hervé et al. 2021                         |
| <i>Fusarium chlamydosporum</i>               | Soil                  | Growth with CaOx as sole C-source                                                                    |                                                         | Simon et al. 2016                         |
| <i>Fusarium equiseti</i>                     | Soil                  | Growth with CaOx as sole C-source                                                                    |                                                         | Simon et al. 2016                         |
| <i>Fusarium nygamai</i>                      | Soil                  | Growth with CaOx as sole C-source                                                                    |                                                         | Simon et al. 2016                         |
| <i>Fusarium oxysporum</i>                    | Soil                  | Growth with CaOx as sole C-source                                                                    |                                                         | Simon et al. 2016                         |
| <i>Fusarium</i> sp.                          | Leaf litter           | Growth with CaOx as sole C source                                                                    |                                                         | Hervé et al. 2021                         |
| <i>Myrothecium verrucaria</i>                | Plant                 | CO <sub>2</sub> release from oxalic acid as sole C source                                            | 16.6–19.6 μmoles CO <sub>2</sub> /20 μmoles oxalic acid | Lillehoj and Smith 1965                   |
| <i>Nigrosabulum</i> sp.                      | Leaf litter           | Growth with CaOx as sole C-source                                                                    |                                                         | Hervé et al. 2021                         |
| <i>Ochroconis</i> sp.                        | Leaf litter           | Growth with CaOx as sole C-source                                                                    |                                                         | Hervé et al. 2021                         |
| <i>Pseudocoleophoma</i> sp.                  | Leaf litter           | Growth with CaOx as sole C-source                                                                    |                                                         | Hervé et al. 2021                         |
| <i>Purpureocillium</i> sp.                   | Leaf litter           | Growth with CaOx as sole C-source                                                                    |                                                         | Hervé et al. 2021                         |
| <i>Sclerotinia sclerotiorum</i> B24 and SS41 | Culture collection    | Photometric measurements with oxalic acid as sole C source                                           | 12.2–25.8 μg oxalate decarboxylated/min/mg protein      | Magro et al. 1988                         |
| <i>Sclerotinia sclerotiorum</i> WT '1980'    | Plant                 | Odc activity measured by quantifying formate produced via FDH-coupled assay                          | 16 μmole formate produced/mg tissue in 20 min           | Liang et al. 2015                         |
| <i>Sinistachys</i> spp.                      | Leaf litter           | Growth with CaOx as sole C-source                                                                    |                                                         | Hervé et al. 2021                         |
| <i>Trichoderma</i> sp.                       | Leaf litter           | Growth with CaOx as sole C-source                                                                    |                                                         | Hervé et al. 2021                         |
| <i>Basidiomycota</i>                         |                       |                                                                                                      |                                                         |                                           |
| <i>Abortiporus biennis</i>                   | Culture collection    | Oxo activity determined by the formation of H <sub>2</sub> O <sub>2</sub>                            | 1.6–6.4 U/mg                                            | Graz et al. 2009                          |
| <i>Agaricus bisporus</i>                     | Soil and plant litter | ODC activity determined by formate production; HPLC                                                  | 65–111 U/mg protein                                     | Kathiarra et al. 2000                     |
| <i>Agaricus blazei</i>                       | Wood-associated       | Growth and dissolution with CaOx as sole C-source                                                    |                                                         | Guggiari et al. 2011                      |
| <i>Agrocybe aegerita</i>                     | Wood-associated       | Growth and dissolution with CaOx as sole C-source                                                    |                                                         | Guggiari et al. 2011                      |
| <i>Armillaria japonica</i>                   | Wood-associated       | CO <sub>2</sub> release from oxalic acid as sole C source                                            |                                                         | Shimazono 1955                            |

Table 1. Continued

| Taxa                                                       | Source          | Oxalotrophy detection method                                                                                                  | Oxalate utilization                                                 | References              |
|------------------------------------------------------------|-----------------|-------------------------------------------------------------------------------------------------------------------------------|---------------------------------------------------------------------|-------------------------|
| <i>Armillaria mellea</i>                                   | Wood-associated | CO <sub>2</sub> release from oxalic acid as sole C source                                                                     |                                                                     | Shimazono 1955          |
| <i>Ceriporiopsis subvermispora</i>                         | Wood-associated | Formate production with oxalate as sole C source for Odc activity; H <sub>2</sub> O <sub>2</sub> production for Oxo activity. | Odc: 0.081 nkat/mg protein<br>Oxo: 0.07–0.08 nkat/mg protein        | Watanabe et al. 2005    |
| <i>Ceriporiopsis subvermispora</i> FP-10572                | Wood-associated | Oxo activity assay measured H <sub>2</sub> O <sub>2</sub> released during oxalic acid oxidation                               | K <sub>M</sub> : 0.1 mM k <sub>cat</sub> : 88 s <sup>-1</sup>       | Aguilar et al. 1999     |
| <i>Collybia velutipes</i>                                  | Wood-associated | CO <sub>2</sub> release from oxalic acid as sole C source                                                                     | 840–1440 CO <sub>2</sub> evolved mm <sup>3</sup> /30 mins over 40 d | Shimazono 1955          |
| <i>Corioliolus hirsutus</i>                                | Wood-associated | CO <sub>2</sub> release from oxalic acid as sole C source                                                                     | 27–38 CO <sub>2</sub> evolved mm <sup>3</sup> /30 mins over 40 d    | Shimazono 1955          |
| <i>Corioliolus versicolor</i>                              | Wood-associated | CO <sub>2</sub> release from oxalic acid as sole C source                                                                     |                                                                     | Shimazono 1955          |
| <i>Dichomitius squalens</i> PO114                          | Wood-associated | Odc activity using enzyme kit in oxalic acid induced broth                                                                    | 86 μmol oxalic acid decarboxylated/mg protein/min                   | Mäkelä et al. 2002      |
| <i>Flammulina (Collybia) velutipes</i>                     | Wood-associated | Measured liberated <sup>14</sup> C CO <sub>2</sub> from <sup>14</sup> C-oxalic acid solution in the presence of citrate       | 166 μmol/min/mg protein                                             | Mehta and Datta 1991    |
| <i>Flammulina velutipes</i>                                | Wood-associated | HPX 87-H column used to measure OA decrease in plant tissue transformed with with <i>oxd</i> gene                             |                                                                     | Kesarwani et al. 2000   |
| <i>Flammulina velutipes</i>                                | Wood-associated | Measured liberated <sup>14</sup> C CO <sub>2</sub> from <sup>14</sup> C-oxalic acid solution in the presence of citrate       |                                                                     | Chakraborty et al. 2013 |
| <i>Flammulina velutipes</i> ATCC13547                      | Wood-associated | Growth with CaOx as sole C-source                                                                                             |                                                                     | Guggiari et al. 2011    |
| <i>Flammulina velutipes</i> IJF 140502                     | Wood-associated | Induced Odc expression with oxalic acid                                                                                       |                                                                     | Kamthan et al. 2015     |
| <i>Fomitopsis rhodophaea</i>                               | Wood-associated | CO <sub>2</sub> release from oxalic acid as sole C source                                                                     |                                                                     | Dias et al. 2006        |
| <i>Ganoderma tsugae</i>                                    | Wood-associated | Growth with CaOx as the sole C-source                                                                                         |                                                                     | Shimazono 1955          |
| <i>Laetiporus sulphureus</i>                               | Wood-associated | Growth with CaOx as the sole C-source                                                                                         |                                                                     | Guggiari et al. 2011    |
| <i>Lenzites betulina</i>                                   | Wood-associated | CO <sub>2</sub> release from oxalic acid as sole C source                                                                     |                                                                     | Shimazono 1955          |
| <i>Lyophyllum ulmarium</i>                                 | Wood-associated | Growth with CaOx as the sole C-source                                                                                         |                                                                     | Guggiari et al. 2011    |
| <i>Phanerochaete chrysosporium</i> BKM-F-1767 (ATCC 24725) | Grape tissue    | Aa sequence identified using LCMS                                                                                             |                                                                     | Sato et al. 2007        |
| <i>Phanerochaete sanguinea</i> T51                         | Wood-associated | ODC activity using enzyme kit                                                                                                 | 15 μmol oxalic acid decarboxylated/mg protein/min                   | Mäkelä et al. 2002      |
| <i>Phellinus Hartigi</i>                                   | Wood-associated | CO <sub>2</sub> release from oxalic acid as sole C source                                                                     |                                                                     | Shimazono 1955          |

Table 1. Continued

| Taxa                              | Source           | Oxalotrophy detection method                                                                             | Oxalate utilization                               | References           |
|-----------------------------------|------------------|----------------------------------------------------------------------------------------------------------|---------------------------------------------------|----------------------|
| <i>Pholiotia adiposa</i>          | Wood-associated  | CO <sub>2</sub> release from oxalic acid as sole C source                                                |                                                   | Shimazono 1955       |
| <i>Pholiotia mutabilis</i>        | Wood-associated  | CO <sub>2</sub> release from oxalic acid as sole C source                                                |                                                   | Shimazono 1955       |
| <i>Pholiotia nameko</i>           | Wood-associated  | Growth with CaOx as sole C-source                                                                        |                                                   | Guggiari et al. 2011 |
| <i>Pleurotus citrinopileatus</i>  | Wood-associated  | Dissolution of oxalate crystals in solid medium                                                          |                                                   | Guggiari et al. 2011 |
| <i>Pleurotus eryngii</i>          | Wood-associated  | Growth with CaOx as sole C-source                                                                        |                                                   | Guggiari et al. 2011 |
| <i>Pleurotus ostreatus</i>        | Wood-associated  | Growth with CaOx as sole C-source                                                                        |                                                   | Guggiari et al. 2011 |
| <i>Pleurotus tuberregium</i>      | Wood-associated  | Growth with CaOx as sole C-source                                                                        |                                                   | Guggiari et al. 2011 |
| <i>Polyporus ciliatus</i>         | Wood-associated  | Growth with CaOx as sole C-source                                                                        |                                                   | Guggiari et al. 2011 |
| <i>Postia placenta</i> MAD698     | Wood-associated  | Spectrophotometric test kit for oxalate anion release                                                    | 0.42–0.51 units/mg protein                        | Micales 1997         |
| <i>Pycnoporus cinnabarinus</i>    | Wood-associated  | Oxalate consumption by HPLC                                                                              |                                                   | Guggiari et al. 2011 |
| <i>Shizophyllum commune</i>       | Wood-associated  | CO <sub>2</sub> release from oxalic acid as sole C source                                                |                                                   | Shimazono 1955       |
| <i>Tilletia contraversa</i>       | Wood-associated  | Oxalic acid oxidation measured by respiratory <sup>14</sup> CO <sub>2</sub> from <sup>14</sup> C-oxalate |                                                   | Vaisey et al. 1961   |
| <i>Trametes ochracea</i> T7       | Wood-associated  | ODC activity using enzyme kit                                                                            | 9 μmol oxalic acid decarboxylated/mg protein/min  | Mäkelä et al. 2002   |
| <i>Trametes sanguinea</i>         | Wood-associated  | CO <sub>2</sub> release from oxalic acid as sole C source                                                |                                                   | Shimazono 1955       |
| <i>Trametes suaveolens</i>        | Wood-associated  | Dissolution of crystals on solid medium                                                                  |                                                   | Guggiari et al. 2011 |
| <i>Trametes versicolor</i> PRL572 | Wood-associated  | Oxd activity by photometric measurement of CO <sub>2</sub> from oxalic acid as sole C source             | 1–2.25 U/mg protein                               | Zhu and Hong 2010    |
| <i>Trametes versicolor</i> R/7    | Wood-associated  | Odc activity using enzyme kit                                                                            | 41 μmol oxalic acid decarboxylated/mg protein/min | Mäkelä et al. 2002   |
| <i>Deuteromycota</i>              |                  |                                                                                                          |                                                   |                      |
| <i>Coniothyrium nimitans</i> ZS-1 | Plant-associated | Oxalate degradation measured by HPLC                                                                     |                                                   | Xu et al. 2022       |
| <i>Mucormycota</i>                |                  |                                                                                                          |                                                   |                      |
| <i>Absidia</i> spp.               | Leaf litter      | Growth with CaOx as sole C-source                                                                        |                                                   | Hervé et al. 2021    |
| <i>Lichtheimia</i> sp.            | Leaf litter      | Growth with CaOx as sole C-source                                                                        |                                                   | Hervé et al. 2021    |



## Fungal oxalotrophy

A dynamic relationship exists between fungi, oxalic acid, and the environment (Gadd 1999, Gadd et al. 2014, Palmieri et al. 2019). Much of the work on oxalate processing by fungi has focused on oxalogenesis rather than oxalotrophy, a process dominated by basidiomycetous brown and white wood-rot fungi from soil environments (Shimada et al. 1997, Munir et al. 2001, Mäkelä et al. 2002, Jarosz-Wilkolańska and Grąz 2006, Guggiari et al. 2011). Filamentous Asco- and Mucoromycetes have also been shown to be capable of oxalic acid biosynthesis. Some fungal taxa, such as *Aspergillus*, *Fusarium*, and *Pleurotus* spp. are capable of both oxalogenesis and oxalotrophy, switching from anabolism to a catabolic metabolism under nutrient-rich conditions. The duality in fungal oxalate metabolism may explain why oxalotrophy in the environment has largely been overlooked in lower eukaryotes (Gadd 1999, Guggiari et al. 2011, Palmieri et al. 2019).

The enzyme mostly reported to be associated with fungal oxalotrophy is oxalate decarboxylase (OXD; EC 4.1.1.2), which degrades oxalic acid into formate and carbon dioxide (CO<sub>2</sub>) (Shimazono 1955, Kathiara et al. 2000, Mäkelä et al. 2002, Zhu and Hong 2010, Kamthan et al. 2015, Kumar et al. 2016). This mainly intracellular enzyme, which is also found in bacteria (Just et al. 2004), occurs within vesicles close to the plasma membrane, as well as attached to the fungal cell wall (Dutton et al. 1994, Micales 1997, Kathiara et al. 2000, Sato et al. 2007, Mäkelä et al. 2009). It was predicted that OXD occurs in most lignocellulose-degrading basidiomycetes, but it is best documented for *Flammulina (Collybia) velutipes* (Mehta and Datta 1991, Kesarwani et al. 2000, Dias et al. 2006, Guggiari et al. 2011, Chakraborty et al. 2013, Kamthan et al. 2015), *Trametes (Coriolus) versicolor* (Shimazono 1955, Dutton et al. 1994, Mäkelä et al. 2002, Zhu and Hong 2010, Guggiari et al. 2011), and *Pholiota* spp. (Guggiari et al. 2011).

A second enzyme found to be associated with fungal oxalotrophy is oxalate oxidase (OXO, oxalate: oxygen oxidoreductase, EC 1.2.3.4) (Aguilar et al. 1999, Svedružić et al. 2005, Watanabe et al. 2005, Grąz et al. 2009). This enzyme, which has been reported in the white-rot fungi *A. bienni* and *C. subvermispora*, cleaves oxalate into two CO<sub>2</sub> molecules and hydrogen peroxide (Aguilar et al. 1999, Grąz et al. 2009). Both OXD and OXO activities have been reported for *C. subvermispora*, (Mäkelä et al. 2009). The presence of multiple genes associated with oxalotrophy in a single genome suggests that different enzyme isoforms may play different physiological roles in oxalotrophic fungi (Mäkelä et al. 2010).

Formate dehydrogenase (FDH, EC 1.2.1.2. and 1.2.2.1) may also play an important role in fungal oxalotrophy, since this enzyme can convert potentially toxic formate (produced by OXD) to CO<sub>2</sub> (Watanabe et al. 2005). The co-location of the *fdh* and *oxd* genes in fungal genomes (Sato et al. 2009) also suggests a functional link between the two gene products, a concept supported by observations of the co-expression of *odc* and *fdh* genes in some basidiomycetes (Sato et al. 2007, 2009).

Although the genes implicated in oxalotrophy have been recorded in many fungi, relatively little is known of their gene expression control, the detailed structures and functional properties of enzymes, or their physiological roles. The potential link between oxalic acid degradation and energy generation is also poorly understood.

Analogous to the role of oxalic acid in fungus-plant symbioses (Dutton et al. 1996), it is suggested that oxalic acid may play important role in bacterial-fungal interactions (Deveau

et al. 2018). Simon et al. (2016) proposed that oxalotrophic bacteria in soil environments are generally nonmotile and require fungal hyphae as a ‘transit’ mechanism to locate environmental oxalate reserves (Bravo et al. 2013a). It has been demonstrated that fungus-derived oxalic acid can act as a chemoattractant for motile oxalotrophic bacteria, which then utilize the secreted oxalic acid as a carbon and energy source (Haq et al. 2018, Rudnick et al. 2015).

The role of fungi in oxalate-carbonate pathway processes is poorly understood, although it is generally appreciated that the contribution of oxalotrophic fungi is under-estimated (Martin et al. 2012, Hervé et al. 2021).

## Environmental microbiomics of oxalotrophs

### Phylogenetic diversity of oxalotrophic taxa

Recent advances in molecular techniques, particularly metabarcoding and metagenomic methods, have allowed researchers to investigate the uncultured fraction of oxalotrophic taxa in virtually any environment and at scales from local to regional to global.

Specific marker genes are widely accepted as indicators of the capacity for oxalotrophy in different groups of organisms and under different environmental conditions (*oxdC*, bacterial, anaerobic; *oxc*, *frc*, *oxlT*, bacterial, aerobic; *odc*, *oxo*, fungal; see Fig. 1). Nevertheless, caution is advised in generating functional interpretations from gene marker data. The *frc* gene is not unique to oxalotrophy and is not considered to be adequate as a sole molecular marker for this process (Khammar et al. 2009). The inclusion of both *oxdC* and *oxc* genes as markers is, however, considered to be sufficient to confirm the presence of microbial oxalotrophy (Sonke and Trembath-Reichert 2023). Alternatively, it has been suggested that the entire oxalate operon, with both the *oxc* and *frc* genes, is a valid marker for oxalotrophy (Azcarate-Peril et al. 2006).

In fungi, the genes encoding the oxalate decarboxylase (EC 4.1.1.2) or oxalate oxidase (EC 1.2.3.4) (Grąz et al. 2023) (see Fig. 1) could be used as markers, although, to the authors’ knowledge, the latter has not been used in any molecular marker studies to date.

Notwithstanding the power of eDNA-based methods, metabarcoding approaches rely on conserved consensus sequences and therefore may not identify novel or highly sequence-variable oxalotrophic genes (Simon et al. 2016).

Alternative approaches to functional prediction using phylogenetic datasets, such as the ‘‘function from phylogeny’’ algorithms PiCRUSt (<https://picrust.github.io/picrust>) and Tax4Fun (<http://tax4fun.gobics.de>), could also aid in the identification of oxalotrophic capacity. These programs generate functional predictions based on alignments between metabarcoding data and genomic data from known genomes (Douglas et al. 2020, Wemheuer et al. 2020), and are therefore solely predictive in nature. However, they do provide a valuable basis for further experimental verification. A study of termite gut microbiomes (Suryavanshi et al. 2016) demonstrated that the use of PiCRUSt could predict oxalotrophic functional genes via KEGG Orthology. This study inferred the presence of a highly diverse oxalotrophic community in the termite gut, suggesting the presence of five different oxalotrophic pathways with formate, carbon dioxide or hydrogen peroxide as potential metabolic end-products.

A pioneering study (Sahin 2003) suggested that most oxalotrophic taxa identified in public sequence databases were aerobes and clustered into either proteobacterial or

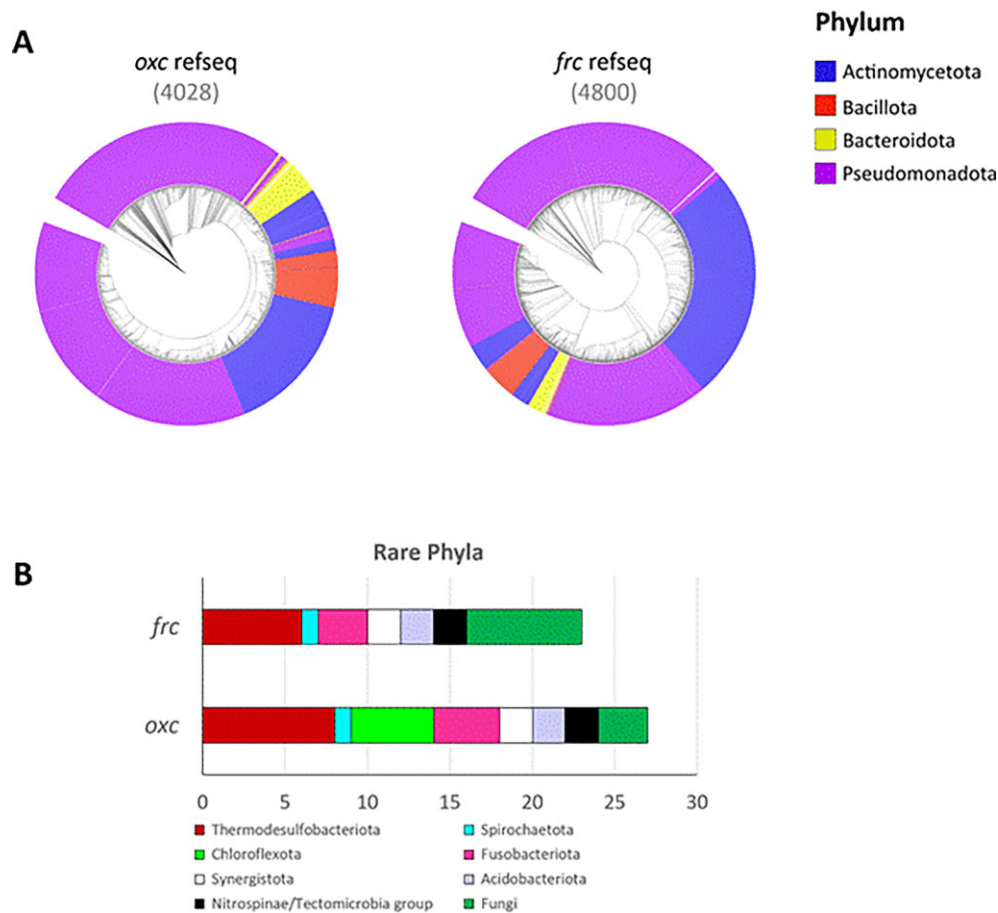

**Figure 2.** (A) Phylogenetic trees of the protein sequences of the two essential oxalotrophic genes, oxalyl-CoA decarboxylase (OXC) and formyl-CoA transferase (FRC). Sequences were extracted from the Refseq protein database. Numbers of sequences used to draw the trees are shown in brackets above each tree. The sequences were first aligned using MAFFT and the tree calculated using FastTree v2.0, while the trees were drawn using the ItoI webserver. Sequences belonging to the dominant phyla (phyla that contained >1% of the total number of sequences for each marker gene) are highlighted in the tree using color strips. (B) Barplot showing the number of OXC and FRC sequences, retrieved from the RefSeq database belonging to rare phyla (i.e. phyla that contained <1% of total retrieved sequences for either marker gene).

actinobacterial clades. Gram-negative oxalotrophic bacteria belonged to various Pseudomonadota subclasses ( $\alpha$ ,  $\beta$ , and  $\gamma$  with one  $\delta$ ), whereas Gram-positive oxalotrophs aligned with the Bacillota and Actinomycetota phyla.

Probably the most comprehensive phylogenetic analysis of the key oxalotrophy genes (*oxc*, *frc*, *oxdC*, and *oxIT*) was a recently published (Sonke and Trembath-Reichert 2023) bioinformatic study of publicly available genome and metagenome datasets. *Oxc* genes clustered into three primary Groups, each including several separate clades: Group I included multiple genera from the phylum Actinomycetota, Group II consisted of several Pseudomonadota-dominated clades largely of terrestrial origin, while Group III was composed exclusively of Alphaproteobacteria but from diverse origins, including hydrothermal vent waters, cold marine sediments, plant microbiomes, and human gut samples.

*OxdC* genes clustered into two primary groups, each of multiple clades. As for *oxc* gene phylogeny, taxonomic assignments within clades were mostly homogeneous [Pseudomonadota and Bacillota for prokaryotes, and various fungal phyla and the chlorophyte Chloroflexota (previously Chloroflexi)]. The homogeneous clustering of genes according to taxonomic groups was interpreted as evidence for vertical inheritance rather than Horizontal Gene Transfer (although some evi-

dence for the latter was noted) (Sonke and Trembath-Reichert 2023).

Similar phylogenetic distributions have been observed using other marker gene sets. Khammar et al. (2009) used degenerate primers to identify both *frc* and *oxc* genes. The study revealed a high taxonomic similarity between *frc* genes, most of which grouped within  $\alpha$ - and  $\beta$ -proteobacterial clades. The  $\beta$ -proteobacterial cluster included *frc* genes positioned adjacent to *oxc* genes, thought to be indicative of an oxalate operon (Azcarate-Peril et al. 2006).

A comparison of the cultured oxalotroph diversity with putative oxalotrophic taxa identified in sequence datasets suggests that a high proportion of oxalotrophs remain uncultured (e.g. Barka et al. 2016). Given that a proportion of marker sequences cannot be assigned to any known taxa (Sun et al. 2019), it is also possible that these “dark” oxalotrophs may harbor alternative oxalotrophic pathways (Janssen 2006).

An up-to-date phylogenetic survey of OXC and FRC protein sequences from the NCBI RefSeq database (Fig. 2) shows, as previously reported (Palmieri et al. 2019), that these oxalotrophic markers are mainly present in four phyla: Pseudomonadota, Bacillota, Bacteroidota (previously Bacterioidetes), and Actinomycetota (Fig. 2A). In the case of OXC, the sequences from Bacteroidota, Actinomycetota and

Bacillota form a phylogenetic cluster distinct from the majority of Pseudomonadota sequences, suggesting that they are more closely related. By contrast, the phylogenetic clustering of the FRC proteins is less evident, with the Bacillota and Bacteroidota sequences clustering together in a distinct phylogenetic clade. The sequences for both markers were also found in taxa that are not often associated with oxalotrophy (Fig. 2B). These include the Fusobacteriota genus *Cetobacterium*, which is often associated with fish intestinal tracts (Ramirez et al. 2018, Qi et al. 2023), and the bacterial marine sponge symbiont *Entotheonella palauensis* (from the Nitrospinae/Tectomicrobia group) (Lackner et al. 2017, Schmidt et al. 2000). The Chloroflexi genus *Tepidiforma* was found to only contain sequences for the *oxc* gene, and a recent study (Palmer et al. 2023) has shown that two members in this genus, *Tepidiforma flava* and *Tepidiforma thermophila*, were unable to grow with oxalate as a sole carbon source, further suggesting that both marker genes are essential for oxalotrophy. While both OXC and FRC proteins were found in Fungi, none of the fungal taxa in the database contained both markers, consistent with the view that fungi catabolize oxalate using alternative enzyme pathways (Fig. 1).

**Phylogeography of oxalotrophic taxa:** Although best known for their presence (and function) in soil ecosystems (Palmieri et al. 2019), plant rhizospheres (Voronina and Sidorova 2017) and the human gut (Sadaf et al. 2017), oxalotrophs now appear to be present in widely diverse habitats, including oxic and anoxic, mesophilic and thermophilic, oligotrophic and copiotrophic, halophilic and nonhalophilic and neutrophilic and acidophilic environments. Metagenomic sequence data suggest that oxalotrophic capacity, encoded by both prokaryotes and lower eukaryotes and probably associated with multiple taxa in any specific habitat, exists in environments as diverse as soils, compost, plant-associated communities (e.g. rhizospheric and ectomycorrhizal microbiomes), waste and fresh water, acid mine drainage, marine water, deep sea hydrothermal fluids, marine sediments, and animal and invertebrate gut systems (Suryavanshi et al. 2016, Tanca et al. 2017, Sonke and Trembath-Reichert 2023).

## Ecosystem services and functions of oxalotrophy in relation to the SDGs

### Sustainable agriculture (SDG 2: promote sustainable agriculture)

Oxalotrophic bacteria have been studied in numerous natural ecosystems, but their presence and role in agricultural soils and their association with crops is not well understood. Oxalotrophy and oxalate production are important in recruiting plant-beneficial endophytic bacteria for important crops such as lupin and maize (Kost et al. 2013). Oxalotrophy has also been highlighted as a possible way to ameliorate acid soils (Xu et al. 2019). Soil acidity affects 40% of arable land and is a major problem affecting food security in many developing countries where lime sources are unaffordable. As a result, alternative ways to buffer acid soils are highly sought after. Xu et al. (2019) examined the effect of CaOx addition to acid soils fertilized either by manure or NPK fertilizer. Their findings demonstrated that oxalotrophy in both fertilized and manured soils increased soil pH, but manured soils responded more rapidly to CaOx addition due to functional redundancy. While the application of CaOx to agricultural soils is not economically feasible, the potential of oxalotrophy to reduce soil

acidity should be further explored, especially given how prevalent CaOx can be in crop residues.

Oxalotrophy can also play a role in the soil stability of cultivated fields. In a study on the CaOx content of soybean plants (*Glycine max*), it was suggested that the rapid breakdown of CaOx contained in unharvested crop residues is important for Ca recycling. This rapid release of Ca was suggested to maintain aggregate stability and good physical soil structure in the intensively cultivated Mollisols of Argentina (Borrelli et al. 2016). More work to understand the role of oxalotrophy and Ca release in other crop residues is important, as this could be a further advantage of minimum tillage practices, which aim to retain plant residues in the soil.

### Nutrient cycling in ecosystems (SD 15: Life on land)

The role of CaOx in ecosystem Ca cycling is deemed to be an important issue (Dauer and Perakis 2014, Turpault et al. 2019, Parsons et al. 2022) with the view that Ca dynamics are different from other basic cation cycles due to fungal CaOx production and subsequent microbial breakdown resulting in rapid Ca turnover (Dauer and Perakis 2014). Calcium is an essential nutrient in plants and animals and understanding the cycling of Ca in the environment is essential for sustainable management of ecosystems and their biodiversity.

Calcium is often a limiting nutrient in weathered tropical ecosystems and dystrophic forest soils (Dauer and Perakis 2014, Turpault et al. 2019). A large component (23%–40%) of the total Ca in detritus of temperate forest ecosystems is made up of CaOx (Dauer and Perakis 2014). This biomineral and its microbial breakdown is increasingly being recognized as an important component of Ca flux through these ecosystems. In low-Ca forest soils it was demonstrated that CaOx contribution to the total Ca pool was greater and the turnover rate of CaOx was faster compared to a high-Ca forest ecosystem (Dauer and Perakis 2014). This highlights the importance of CaOx and oxalotrophy in nutrient cycling of dystrophic ecosystems (Dauer and Perakis 2014, Turpault et al. 2019).

The importance of biodiversity and the ecosystem health of the CaOx biogeochemical cycle has only recently been recognized. Soil detritivores such as earthworms, springtails, and termites carry CaOx-degrading bacteria in their digestive systems (Cromack et al. 1977, Suryavanshi et al. 2016). Substantial quantities of CaOx from plant litter are processed and ingested by soil fauna such as earthworms and oribatids in deciduous forest ecosystems (Cornaby et al. 1975, Rehman et al. 2021) and, in semi-arid regions, oribatids, and termites play an important role in this process (Francis and Poch 2019) with the litter-transforming oribatids making CaOx-rich litter accessible for subsequent microbial degradation and mineralization (Cornaby et al. 1975, Francis and Poch 2019, Rehman et al. 2021). Work on intact west African forests and adjacent degraded lands has shown that both an intact, healthy, and functioning ecosystem with soil fauna and intact pore spaces are needed for the processes of Ca bioaccumulation to take place (Rehman et al. 2021). Arthropods, diplopods, isopods, oribatids, and snails accumulate significant concentrations of Ca in the form of oxalate and/or carbonate in their exoskeletons (Cromack et al. 1977, Norton and Behan-Pelletier 1991). Unlike CaOx associated with root exudates, fungi, and bacteria, the higher mobility of the soil mesofauna further disperses CaOx throughout soil ecosystems, but this has not yet been factored into soil CaOx budgets.



## Carbon sequestration and the oxalate-carbonate pathway (Goal 13: Climate action, Goal 15: life on land)

Carbon sequestration in both biomass and soils is the major driver of atmospheric CO<sub>2</sub> drawdown in nature-based solutions, yet the permanence of organic carbon soil sequestration is not always certain (Dees et al. 2023). However, conversion of organic carbon to soil inorganic carbon via the oxalate-carbonate pathway can result in almost permanent carbon sequestration, either in the form of soil carbonates in semi-arid and drier climates or leaching of bicarbonate to groundwater and transport to the ocean in more humid climates, where it counteracts ocean acidification and stores atmospheric carbon (Hartmann et al. 2013, Monger et al. 2015, Taylor et al. 2016, Zhang et al. 2022).

The importance of the oxalate-carbonate pathway in landscape carbon dynamics has been increasingly recognized over the past decade (Cailleau et al. 2011, Martin et al. 2012, Aragno and Verrecchia 2012, Rowley et al. 2017, Pons et al. 2018, Uren 2018, Francis and Poch 2019, Hervé et al. 2021, Rehman et al. 2021). The metabolic breakdown of CaOx by microorganisms produces energy, which is utilized by the organism, as well as inorganic carbon (bicarbonate) and calcium (Uren 2018). Oxidation of CaOx by oxalotrophic microbes may induce a pH shift in soil solution due to the transformation of a stronger acid (oxalic acid; pk1 = 1.25, pk2 = 4.27) to a weaker acid (carbonic acid; pk1 = 6.35, pk2 = 10.33) and concomitant consumption of protons. If the soil environment is sufficiently alkaline, precipitation of calcium carbonate is favored (Braissant et al. 2004, Parsons et al. 2022). An increase of 2.5 pH units was observed in sterilized soils treated with oxalate and oxalotrophic fungi and bacteria after 90 days of incubation, and this shift occurred within <10 days in natural soils harboring an active guild of autochthonous oxalotrophic microorganisms (Martin et al. 2012).

The individual reactions associated with the oxalate-carbonate pathway can be summarised as follows:

Sparingly soluble calcium oxalate dissolves and dissociates:

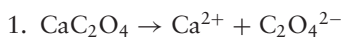

Microorganisms catalyze the aerobic oxidation of oxalate:

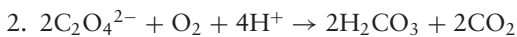

Because pH increases (protons are consumed) when oxalate is oxidized, carbonic acid will dissociate to form bicarbonate:

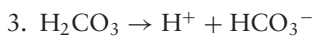

And the bicarbonate will dissociate to form carbonate ions:

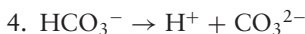

The calcium released from Ca-oxalate dissolution and the bicarbonate produced from carbon oxidation react to form CaCO<sub>3</sub>:

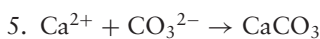

The overall reaction can be written in many ways, for example:

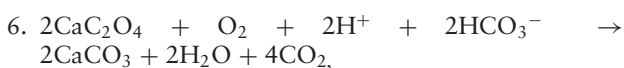

which shows that 4 moles of carbon in CaOx are oxidized to 4 moles of CO<sub>2</sub> while the pH shift results in two moles of carbon (as dissolved inorganic carbon) being precipitated as

calcite. This representation demonstrates that not all the carbon involved in the OCP is necessarily from oxalate oxidation; ambient bicarbonate derived from “background” soil respiration might contribute to the carbon sequestered as calcite. If we represent all valence four carbons as CO<sub>2</sub>, then reaction six simplifies to:

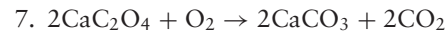

The overall RQ for the OCP process is two.

The Ca and carbon mass balance of an oxalogenic-oxalotrophic ecosystem [soil under a *Milicia excelsa* (Iroko) tree] was modelled according to biogeochemical changes associated with the oxalate-carbonate pathway and 800 kg of calcium carbonate was predicted to accumulate over the course of 170 years in the soil (Gatz-Miller et al. 2022). Approximately 1000 kg of inorganic carbon was predicted to accumulate in soil surrounding an 80-year-old Iroko tree via the oxalate-carbonate pathway (Braissant et al. 2004). Cactus biomass accumulates ~1.8 × 10<sup>11</sup> g year<sup>-1</sup> atmospheric carbon as CaOx across the Sonoran, Chihuahua, Great Basin, and Mojave deserts. The saguaro cactus of Arizona sequesters up to 40 g atmospheric C m<sup>-2</sup> in CaOx and releases an estimated 2.4 g calcite m<sup>-2</sup> year<sup>-1</sup> into the soil (Garvie 2006). Oxalotrophic microorganisms therefore contribute to long-term storage of carbon in mineral form as calcium carbonate, which has a much longer mean residence time in soils compared to organic compounds (Braissant et al. 2004, Verrecchia et al. 2006).

## Climate change and preservation of biodiversity

Nature-based solutions are increasingly recognized as an important tool for harnessing ecosystem services to fight climate change while supporting biodiversity (Seddon et al. 2020). Ecosystems supporting CaOx-rich vegetation in both arid and humid regions potentially provide important carbon sequestration services via the oxalate-carbonate pathway (Garvie 2006, Cailleau et al. 2011, Rehman et al. 2021). Drylands have lower soil organic carbon contents than their more humid counterparts (Lal et al. 2021, Heckman et al. 2023) and so have not been prioritized for conservation, despite occupying ~40% of Earth's land surface (Sørensen 2007). Oxalotrophy as an ecosystem service for carbon capture in arid and semi-arid regions, as well as more humid regions, is a vital priority for future research. With semi-arid and drier environments occupying almost half the earth's land surface, even small amounts of annual carbon sequestration can have a large impact on atmospheric CO<sub>2</sub> drawdown (Lal et al. 2021) and the impact of leached bicarbonate generated in tropical ecosystems has not been accounted for, in spite of the fact that the oxalate-carbonate pathway has been documented as important for carbon cycling in west African (Cailleau et al. 2011, Rehman et al. 2021), Amazonian (Cailleau et al. 2014), Indian (Hervé et al. 2018), and Madagascan forest ecosystems (Hervé et al. 2021).

There are also likely to be unique ecosystems where the rates of oxalotrophy are surprisingly high. One such example may be the Subtropical Thicket of South Africa, which is characterized by a closed-canopy vegetation rich in succulent species (Vlok et al. 2003), but also occurs in a semi-arid climate. Given the erratic nature of rainfall in the region, “alarm” photosynthesis, a drought adaptation in plants where CaOx provides a source of CO<sub>2</sub> during periods of



extended stomatal closure (Tooulakou et al. 2016), is likely to be common. More importantly, this type of photosynthesis has been recorded in *Portulacaria afra* (Tooulakou et al. 2016), a stem and leaf succulent tree, that is commonly a dominant component of Subtropical Thicket vegetation (Penzhorn et al. 1974; Vlok et al. 2003). This species promotes litter production, water and sediment trapping, and carbon accumulation (Lechmere-Oertel et al. 2005, 2008, Mills and Cowling 2010; van Luijk et al. 2013) and may be a source of extensive oxalotrophy.

However, in line with the global trends in biodiversity loss (PBES 2019, Pimm and Raven 2019), ecosystems where oxalotrophy is likely, or has been documented, are also being removed at unprecedented rates. Forests in western Africa have decreased by 83% in under 120 years (Aleman et al. 2018). The Amazon is fast approaching the critical threshold of rainforest decline, with 75% of it having lost resilience in the last 20 years (Boulton et al. 2022). Madagascar has lost 25% of its tree cover in the last 22 years (Suzzi-Simmons 2023). Understanding these organic–inorganic carbon biogeochemical processes and recognition of their economic value as natural capital (Dasgupta 2021) are vital for the future management, rehabilitation, and protection of these ecosystems and the ecosystem services they provide.

Because inorganic carbon is stored over a much longer time-frame than organic carbon, nature-based solutions, with a value multiplier such as organic–inorganic carbon transformation, offer increased land value compared to a more transient organic carbon storage. Nature-based solutions with the potential to store carbon for decades are predicted to accrue a cost in the \$15–\$40 per ton range, whereas engineered solutions with more permanent removal are currently in excess of \$200 per ton (and likely will stay above \$100 per ton even with technological breakthroughs: WEF 2022). The oxalate-carbonate pathway therefore represents a low cost, nature-based solution that has the carbon storage potential of an engineered solution, and so ecosystems where this takes place offer potential value in terms of their natural capital value (Dasgupta 2021) and this needs to be taken into consideration for ecosystem conservation and regeneration.

## Conclusions

Ecosystems are being lost at an alarming rate without appreciation of the substantial impact that oxalate and oxalotrophy have on ecosystem service provision. Coupled with our lack of understanding of the nonlinear impacts of the removal of such ecosystems, the scale of this destruction may result in magnified negative impacts on human health and well-being, which are directly tied to planetary health and well-being. The role and importance of oxalotrophy in cultivated lands and other ecosystems needs urgent attention to determine how land management practices might influence or capitalize on this carbon capture process. Understanding the intricacies of these organic–inorganic carbon biogeochemical processes is paramount for effectively managing, rehabilitating, and protecting these ecosystems and the ecosystem services they offer.

## Author contributions

D.A. Cowan (Conceptualization, Data curation, Funding acquisition, Supervision, Visualization, Writing – original draft,

Writing – review & editing), D. Babenko (Writing – original draft, Writing – review & editing), R. Bird (Writing – original draft, Writing – review & editing), A. Botha (Supervision, Writing – original draft, Writing – review & editing), D.O. Breecker (Conceptualization, Data curation, Funding acquisition, Visualization, Writing – original draft, Writing – review & editing), c.e. Clarke (Conceptualization, Funding acquisition, Project administration, Supervision, Visualization, Writing – original draft, Writing – review & editing), M.L. Francis (Conceptualization, Writing – original draft, Writing – review & editing), T. Gallagher (Conceptualization, Funding acquisition, Project administration, Supervision, Visualization, Writing – original draft, Writing – review & editing), P.H. Lebre (Formal analysis, Writing – original draft, Writing – review & editing), T. Nel (Conceptualization, Visualization, Writing – original draft, Writing – review & editing), A.J. Potts (Conceptualization, Visualization, Writing – original draft, Writing – review & editing), M. Trindade (Conceptualization, Funding acquisition, Supervision, Visualization, Writing – original draft, Writing – review & editing), and L. Van Zyl (Supervision, Writing – original draft, Writing – review & editing).

*Conflict of interest:* All authors indicate the absence of any conflict of interest.

## Funding

D.A.C. acknowledges the financial support of the NRF (National Research Foundation) CPRR program (grant 137954). P.H.L. acknowledges the award of a senior postdoctoral fellowship from the University of Pretoria. T.N. acknowledges the financial support of the NRF-DAAD Doctoral grant (reference no. PMDS22051410685). This material is based upon work supported by the National Science Foundation (USA) under Grants No 2224993 and No 2224994 and the National Research Foundation of South Africa (Grant Number 150452) as part of the Biodiversity on a Changing Planet program.

## Data availability statement

There are no new data associated with this manuscript

## References

- Adeleke R, Nwangburuka C, Oboirien B. Origins, roles and fate of organic acids in soils: a review. *SA J Bot* 2017;108:393–406. <https://doi.org/10.1016/j.sajb.2016.09.002>
- Aguilar C, Urzúa U, Koenig C et al. Oxalate oxidase from *Ceriporiopsis subvermispota*: biochemical and cytochemical studies. *Arch Biochem Biophys* 1999;366:275–82. <https://doi.org/10.1006/abbi.1999.1216>
- Aleman JC, Jarzyna MA, Staver AC. Forest extent and deforestation in tropical Africa since 1900. *Nature Ecol Evol* 2018;2:26–33. <https://doi.org/10.1038/s41559-017-0406-1>
- Allison MJ, Dawson KA, Mayberry WR et al. *Oxalobacter formigenes* gen. nov., sp. nov.: oxalate-degrading anaerobes that inhabit the gastrointestinal tract. *Arch Microbiol* 1985;141:1–7. <https://doi.org/10.1007/BF00446731>
- Anbazhagan K, Edward Raja C, Selvam GS. Oxalotrophic *paracoccus alcaliphilus* isolated from *amorphophallus* sp. rhizosphere. *World J Microbiol Biotechnol* 2007;23:1529–35. <https://doi.org/10.1007/s11274-007-9397-4>
- Aragno M, Verrecchia E. The oxalate-Carbonate Pathway: a reliable sink for atmospheric CO<sub>2</sub> through calcium carbonate biomineralization in ferralitic tropical soils. In *Microorganisms in Environ-*

- mental Management, pp. 191–9, Springer Netherlands, 2012. [https://doi.org/10.1007/978-94-007-2229-3\\_9](https://doi.org/10.1007/978-94-007-2229-3_9)
- Ardakani MM, Jalayer M, Naeimi H et al. Highly selective oxalate-membrane electrode based on 2,2'-[1,4-butandiyl bis(nitrilo propylidene)]bis-1-naphtholato copper(II). *Biosens Bioelectron* 2006;21:1156–62. <https://doi.org/10.1016/j.bios.2005.04.013>
- Arnott HJ. Calcium oxalate in fungi. In Khan S (ed.), *Calcium Oxalate in Biological Systems* (pp. 73–111). CRC Press, 1995.
- Arvieu JC, Leprince F, Plassard C. Release of oxalate and protons by ectomycorrhizal fungi in response to P-deficiency and calcium carbonate in nutrient solution. *Annals Forest Sci* 2003;60:815–21. <https://doi.org/10.1051/forest:2003076>
- Azcarate-Peril MA, Bruno-Bárcena JM, Hassan HM et al. Transcriptional and functional analysis of oxalyl-coenzyme a (CoA) decarboxylase and formyl-CoA transferase genes from *Lactobacillus acidophilus*. *Appl Environ Microb* 2006;72:1891–9. <https://doi.org/10.1128/AEM.72.3.1891-1899.2006>
- Baaziz H, Compton KK, Hildreth SB et al. McpT, a broad-range carboxylate chemoreceptor in *sinorhizobium meliloti*. *J Bacteriol* 2021;203:10–1128. <https://doi.org/10.1128/jb.00216-21>
- Baran EJ, Monje PV. Oxalate biominerals. In *Biomineralization*. Chichester, UK: John Wiley & Sons, Ltd, 2008, 219–54. <https://doi.org/10.1002/9780470986325.ch7>
- Barka EA, Vatsa P, Sanchez L et al. Taxonomy, physiology, and natural products of actinobacteria. *Microbiol Molec Biol Rev* 2016;80:1–43. <https://doi.org/10.1128/MMBR.00019-15.Address>
- Bassalik K, Bassalik K. *Über die Verarbeitung der Oxalsäure durch Bacillus Exorquens n. sp.* Basel, Switzerland: Universität Basel, 1913.
- Becking JH. *Bergey's Manual of Systematic Bacteriology, Vol. 1*. Baltimore, Md: Williams and Wilkins, 1984, 311–21,
- Bonazza A, Natali C, Ghedini N et al. Oxalate patinas on stone monuments in the Venetian Lagoon: characterization and origin. *Internat J Architect Heritage* 2015;9:542–52. <https://doi.org/10.1080/15583058.2013.837546>
- Borrelli N, Benvenuto ML, Osterrieth M. Calcium oxalate crystal production and density at different phenological stages of soybean plants (*Glycine max* L.) from the southeast of the Pampean Plain. *Argentina Plant Biol* 2016;18:1016–24. <https://doi.org/10.1111/plb.12487>
- Boulton CA, Lenton TM, Boers N. Pronounced loss of Amazon rainforest resilience since the early 2000 s. *Nature Clim Change* 2022;12:271–8. <https://doi.org/10.1038/s41558-022-01287-8>
- Braissant O, Cailleau G, Aragno M et al. Biologically induced mineralization in the tree *Milicia excelsa* (Moraceae): its causes and consequences to the environment. *Geobiology* 2004;2:59–66.
- Braissant O, Verrecchia EP, Aragno M. Is the contribution of bacteria to terrestrial carbon budget greatly underestimated? *Naturwissenschaften* 2002;89:366–70. <https://doi.org/10.1007/s00114-002-0340-0>
- Bravo D, Braissant O, Cailleau G et al. Isolation and characterization of oxalotrophic bacteria from tropical soils. *Arch Microbiol* 2015;197:65–77. <https://doi.org/10.1007/s00203-014-1055-2>
- Bravo D, Braissant O, Solokhina A et al. Use of an isothermal microcalorimetry assay to characterize microbial oxalotrophic activity. *FEMS Microbiol Ecol* 2011;78:266–74. <https://doi.org/10.1111/j.1574-6941.2011.01158.x>
- Bravo D, Cailleau G, Bindschedler S et al. Isolation of oxalotrophic bacteria able to disperse on fungal mycelium. *FEMS Microbiol Lett* 2013a;348:157–66. <https://doi.org/10.1111/1574-6968.12287>
- Bravo D, Martin G, David MM et al. Identification of active oxalotrophic bacteria by bromodeoxyuridine DNA labeling in a microcosm soil experiments. *FEMS Microbiol Lett* 2013b;348:103–11. <https://doi.org/10.1111/1574-6968.12244>
- Bravo D. *Assessing the Diversity and Metabolism of Oxalotrophic Bacteria in Tropical Soils*. Ph.D. thesis, Neuchâtel, Switzerland: Faculté des Sciences, Université de Neuchâtel, 2013.
- Brečević L, Kralj D. Factors influencing the formation of calcium oxalate hydrates *in vitro*. *Medic Vjesn* 2010;42:127–36.
- Cailleau G, Braissant O, Verrecchia EP. Turning sunlight into stone: the oxalate-carbonate pathway in a tropical tree ecosystem. *Biogeosciences* 2011;8:1755–67. <https://doi.org/10.5194/bg-8-1755-2011>
- Cailleau G, Mota M, Bindschedler S et al. Detection of active oxalate-carbonate pathway ecosystems in the Amazon Basin: global implications of a natural potential C sink. *Catena* 2014;116:132–41. <https://doi.org/10.1016/j.catena.2013.12.017>
- Campieri C, Campieri M, Bertuzzi V et al. Reduction of oxaluria after an oral course of lactic acid bacteria at high concentration. *Kidney Internat* 2001;60:1097–105. <https://doi.org/10.1046/j.1523-1755.2001.0600031097.x>
- Certini G, Corti G, Ugolini FC. Vertical trends of oxalate concentration in two soils under *Abies alba* from Tuscany (Italy). *J Plant Nutr Soil Sci* 2000;163:173–7. [https://doi.org/10.1002/\(SICI\)1522-2624\(200004\)163:2](https://doi.org/10.1002/(SICI)1522-2624(200004)163:2)
- Chakraborty N, Ghosh R, Ghosh S et al. Reduction of oxalate levels in tomato fruit and consequent metabolic remodelling following overexpression of a fungal oxalate decarboxylase. *Plant Physiol* 2013;162:364–78. <https://doi.org/10.1104/pp.112.2.09197>
- Chamjangali MA, Keley V, Bagherian G. Kinetic spectrophotometric method for the determination of trace amounts of oxalate by an activation effect. *Analy Sci* 2006;22:333–6. <https://doi.org/10.2116/analsci.22.333>
- Chamjangali MA, Sharif-Razavian L, Yousefi M et al. Determination of trace amounts of oxalate in vegetable and water samples using a new kinetic-catalytic reaction system. *Spectrochim Acta A: Molec Biomolec Spectrosc* 2009;73:112–6. <https://doi.org/10.1016/j.saa.2009.01.027>
- Chandra TS, Shethna Y. Oxalate, formate, formamide, and methanol metabolism in *Thiobacillus novellus*. *J Bacteriol* 1977;131:389–98. <https://doi.org/10.1128/jb.131.2.389-398.1977>
- Chen P, Cen L, Wang Y et al. Rapid binary visual detection of oxalate in urine samples of urolithiasis patients via competitive recognition and distance reading test strips. *J Material Chem B* 2023;11:2530–7. <https://doi.org/10.1039/D2TB02666J>
- Chen ZC, Liao H. Organic acid anions: an effective defensive weapon for plants against aluminum toxicity and phosphorus deficiency in acidic soils. *J Genet Genom* 2016;43:631–8. <https://doi.org/10.1016/j.jgg.2016.11.003>
- Collins MD, Lawson PA, Willems A et al. the phylogeny of the genus *Clostridium*: proposal of five new genera and eleven new species combinations. *Internat J System Evolut Microbiol* 1994;44:812–26. <https://doi.org/10.1099/00207713-44-4-812>
- Compant S, Nowak J, Coenye T et al. Diversity and occurrence of *Burkholderia* spp. in the natural environment. *FEMS Microbiol Rev* 2008;32:607–26. <https://doi.org/10.1111/j.1574-6976.2008.00113.x>
- COP 15. 2022 Decision adopted by the Conference of the Parties to the Convention on Biological Diversity 15/4. Kunming-Montreal Global Biodiversity Framework. <https://www.cbd.int/doc/decisions/cop-15/cop-15-dec-04-en.pdf>
- Cornaby BW, Gist CS, Crossley DA. Resource partitioning in leaf-litter faunas from hardwood-converted to pine forests. In Howell FG, Gentry JB, Smith MH (eds.), *Mineral Cycling in Southeastern Ecosystems*, 1975, 588–97. ERDA symposium series (CONF. 740513).
- Cromack K, Sollins P, Todd RL et al. The role of oxalic acid and bicarbonate in calcium cycling by fungi and bacteria: some possible implications for soil animals. In *Soil Organisms as Components of Ecosystems (Issue 25)*, Minnesota, USA: US Department of Agriculture, 1977. <https://about.jstor.org/terms>
- Daniel SL, Drake HL. Oxalate-and glyoxylate-dependent growth and acetogenesis by *Clostridium thermoaceticum*. *Appl Environ Microb* 1993;59:3062–9. <https://doi.org/10.1128/aem.59.9.3062-3069.1993>

- Daniel SL, Moradi L, Paiste H *et al.* Forty years of *oxalobacter formigenes*, a gutsy oxalate-degrading specialist. *Appl Environ Microb* 2021;87:e00544–21. <https://doi.org/10.1128/AEM.00544-21>
- Daniel SL, Pilsel C, Drake HL. Anaerobic oxalate consumption by microorganisms in forest soils. *Res Microbiol* 2007;158:303–9. <https://doi.org/10.1016/j.resmic.2006.12.010>
- Dasgupta P. *The Economics of Biodiversity: The Dasgupta Review*. London, UK : Report published by HM Treasury, 2021, 610.
- Dauer JM, Perakis SS. Calcium oxalate contribution to calcium cycling in forests of contrasting nutrient status. *Forest Ecol Manag* 2014;334:64–73. <https://doi.org/10.1016/j.foreco.2014.08.029>
- De Lajudie P, Willems A, Pot B *et al.* Polyphasic taxonomy of rhizobia: emendation of the genus *sinorhizobium* and description of *sinorhizobium meliloti* comb. nov., *sinorhizobium sabehi* sp. nov., and *sinorhizobium teranga* sp. nov. *Internat. J System Bacteriol* 1994;44:715–33. <https://doi.org/10.1099/00207713-44-4-715>
- Dees J, Sagues WJ, Woods E *et al.* Leveraging the bioeconomy for carbon drawdown. *Green Chem* 2023;25:2930–57. <https://doi.org/10.1039/D2GC02483G>
- Dehning I, Schink B. Two new species of anaerobic oxalate-fermenting bacteria, *oxalobacter vibrioformis* sp. nov. and *Clostridium oxalicum* sp. nov., from sediment samples. *Arch Microbiol* 1989;153:79–84. <https://doi.org/10.1007/BF00277545>
- Deveau A, Bonito G, Uehling J *et al.* Bacterial–fungal interactions: ecology, mechanisms and challenges. *FEMS Microbiol Rev* 2018;42:335–52. <https://doi.org/10.1093/femsre/fuy008>
- Dias BBA, Cunha WG, Morais LS *et al.* Expression of an oxalate decarboxylase gene from *Flammulina* sp. in transgenic lettuce (*Lactuca sativa*) plants and resistance to sclerotinia sclerotiorum. *Plant Pathol* 2006;55:187–93. <https://doi.org/10.1111/j.1365-3059.2006.01342.x>
- Diffenbaugh NS, Barnes EA, Keys PW. Probability of continued local-scale warming and extreme events during and after decarbonization. *Environ Res: Climate* 2023;2:021003. <https://doi.org/10.1088/2752-5295/accf2f>
- Dilly O. Microbial respiratory quotient during basal metabolism and after glucose amendment in soils and litter. *Soil Biol Biochem* 2001;33:117–27. [https://doi.org/10.1016/S0038-0717\(00\)00123-1](https://doi.org/10.1016/S0038-0717(00)00123-1)
- Douglas GM, Maffei VJ, Zaneveld JR *et al.* PICRUSt2 for prediction of metagenome functions. *Nature Biotechnol* 2020;38:685–8. <https://doi.org/10.1038/s41587-020-0548-6>
- Dutton MV, Evans CS. Oxalate production by fungi: its role in pathogenicity and ecology in the soil environment. *Can J Microbiol* 1996;42:881–95.
- Dutton MV, Kathiara M, Gallagher IM *et al.* Purification and characterization of oxalate decarboxylase from *Coriolus versicolor*. *FEMS Microbiol Lett* 1994;116:321–5. <https://doi.org/10.1111/j.1574-6968.1994.tb06722.x>
- Emami E, Mousazadeh MH. Green synthesis of carbon dots for ultra-sensitive detection of Cu<sup>2+</sup> and oxalate with turn on-off-on pattern in aqueous medium and its application in cellular imaging. *J Photochem Photobiol A: Chemistry* 2021;418:113443. <https://doi.org/10.1016/j.jphotochem.2021.113443>
- Emiliani E, Bekes P. Enzymatic oxalate decarboxylation in *Aspergillus niger*. *Arch Biochem Biophys* 1964;105:488–93
- Federici F, Vitali B, Gotti R *et al.* Characterization and heterologous expression of the oxalyl coenzyme a decarboxylase gene from *Bifidobacterium lactis*. *Appl Environ Microb* 2004;70:5066–73. <https://doi.org/10.1128/AEM.70.9.5066-5073.2004>
- Fischer EM, Sippel S, Knutti R. Increasing probability of record-shattering climate extremes. *Nature Clim Change* 2021;11:689–95. <https://doi.org/10.1038/s41558-021-01092-9>
- Folke C, Polasky S, Rockström J *et al.* Our future in the Anthropocene biosphere. *Ambio* 2021;50:834–69. <https://doi.org/10.1007/s13280-021-01544-8>
- Fomina M, Hillier S, Charnock JM *et al.* Role of oxalic acid overexcretion in transformations of toxic metal minerals by *Beauveria caledonica*. *Appl Environ Microb* 2005;71:371–81. <https://doi.org/10.1128/AEM.71.1.371-381.2005>
- Franceschi V. Calcium oxalate in plants. *Trends Plant Sci* 2001;6:331. [https://doi.org/10.1016/S1360-1385\(01\)02014-3](https://doi.org/10.1016/S1360-1385(01)02014-3)
- Franceschi VR, Nakata PA. Calcium oxalate in plants: formation and function. *Ann Rev Plant Biol* 2005;56:41–71. <https://doi.org/10.1146/annurev.arplant.56.032604.144106>
- Francis ML, Poch RM. Calcite accumulation in a South African heuweltjie: role of the termite microhodotermes viator and oribatid mites. *J Arid Environ* 2019;170:103981. <https://doi.org/10.1016/j.jaridenv.2019.05.009>
- Fujii K, Aoki M, Kitayama K. Biodegradation of low molecular weight organic acids in rhizosphere soils from a tropical montane rain forest. *Soil Biol Biochem* 2013;56:3–9. <https://doi.org/10.1016/j.soilbio.2012.10.024>
- Gadd GM, Bahri-Esfahani J, Li Q *et al.* Oxalate production by fungi: significance in geomycology, biodeterioration and bioremediation. *Fungal Biol Rev* 2014;28:36–55. <https://doi.org/10.1016/j.fbr.2014.05.001>
- Gadd GM. Fungal production of citric and oxalic acid: importance in metal speciation, physiology and biogeochemical processes. *Adv Microb Physiol* 1999;41:47–92. [https://doi.org/10.1016/s0065-2911\(08\)60165-4](https://doi.org/10.1016/s0065-2911(08)60165-4)
- Gadd GM. Geomycology: biogeochemical transformations of rocks, minerals, metals and radionuclides by fungi, bioweathering and bioremediation. *Mycolog Res* 2007;111:3–49. <https://doi.org/10.1016/j.mycres.2006.12.001>
- Gadd GM. Microbial influence on metal mobility and application for bioremediation. *Geoderma* 2004;122:109–19. <https://doi.org/10.1016/j.geoderma.2004.01.002>
- Galán-Llopis JA, Sánchez-Pellicer P, Navarro-López V. Role of microbiome in kidney stone disease. *Curr Opin Urol* 2023;33:84–891.
- Gallagher TM, Breecker DO. the obscuring effects of calcite dissolution and formation on quantifying soil respiration. *Global Biogeochem Cycles* 2020;34:e2020GB006584. <https://doi.org/10.1029/2020GB006584>
- Garvie LAJ. Decay of cacti and carbon cycling. *Naturwissenschaften* 2006;93:114–8. <https://doi.org/10.1007/s00114-005-0069-7>
- Gatz-Miller HS, Gérard F, Verrecchia EP *et al.* Reactive transport modelling the oxalate-carbonate pathway of the Iroko tree; investigation of calcium and carbon sinks and sources. *Geoderma* 2022;410:115655. <https://doi.org/10.1016/j.geoderma.2021.115655>
- Ghate SD, Shastry RP, Rekha PD. Rapid detection of oxalotrophic endophytic bacteria by colony PCR from *Colocasia esculenta* and *Remusatia vivipara*. *Ecolog Genet Genom* 2021;21:100102. <https://doi.org/10.1016/j.egg.2021.100102>
- Gómez IB, Ramos MJ, Rajski L *et al.* Ion chromatography coupled to Q-Orbitrap for the analysis of formic and oxalic acid in beehive matrices: a field study. *Analy Bioanal Chem* 2022;414:2419–30. <https://doi.org/10.1007/s00216-022-03882-2>
- Gordon RE, Mihm JM. A comparison of four species of mycobacteria. *Microbiology* 1959;21:736–48. <https://doi.org/10.1099/00221287-21-3-736>
- Grąz M, Jarosz-Wilkolazka A, Pawlikowska-Pawłęga B. *Abortiporus biennis* tolerance to insoluble metal oxides: oxalate secretion, oxalate oxidase activity, and mycelial morphology. *Biometals* 2009;22:401–10. <https://doi.org/10.1007/s10534-008-9176-1>
- Grąz M, Ruminowicz-Stefaniuk M, Jarosz-Wilkolazka A. Oxalic acid degradation in wood-rotting fungi. Searching for a new source of oxalate oxidase. *World J Microbiol Biotechnol* 2023;39:1–9. <https://doi.org/10.1007/s11274-022-03449-4>
- Guggiari M, Bloque R, Aragno M *et al.* Experimental calcium-oxalate crystal production and dissolution by selected wood-rot fungi. *Internat Biodeter Biodegrad* 2011;65:803–9. <https://doi.org/10.1016/j.ibiod.2011.02.012>



- Hamel R, Levasseur R, Appanna VD. Oxalic acid production and aluminium tolerance in *Pseudomonas fluorescens*. *J Inorg Biochem* 1999;76:99–104. [https://doi.org/10.1016/S0162-0134\(99\)00120-8](https://doi.org/10.1016/S0162-0134(99)00120-8)
- Hansen EH, Winther SK, Gundstrup M. Enzymatic assay of oxalate in urine by flow injection analysis using immobilized oxalate oxidase and chemiluminescence detection. *Analyt Lett* 1994;27:1239–53. <https://doi.org/10.1080/00032719408006365>
- Haq IU, Zwahlen RD, Yang P et al. The response of *Paraburkholderia terrae* strains to two soil fungi and the potential role of oxalate. *Front Microbiol* 2018;9:1–11. <https://doi.org/10.3389/fmicb.2018.00989>
- Hartmann J, West AJ, Renforth P et al. Enhanced chemical weathering as a geoengineering strategy to reduce atmospheric carbon dioxide, supply nutrients, and mitigate ocean acidification. *Rev Geophys* 2013;51:113–49. <https://doi.org/10.1002/rog.20004>
- Hatakka A, Hammel KE. Fungal biodegradation of lignocelluloses. In *Industrial Applications*. Germany: Springer Berlin Heidelberg, 2011, 319–40. [https://doi.org/10.1007/978-3-642-11458-8\\_15](https://doi.org/10.1007/978-3-642-11458-8_15)
- Heckman KA, Possinger AR, Badgley BD et al. Moisture-driven divergence in mineral-associated soil carbon persistence. *Proc Natl Acad Sci, USA* 2023;120: e2210044120. <https://doi.org/10.1073/pnas.2210044120>
- Hervé V, Clerc M, Cailleau G et al. Carbonate accumulation in the bark of *Terminalia bellirica*: a new habitat for the oxalate-carbonate pathway. *Geomicrobiol J* 2018;35:31–39. <https://doi.org/10.1080/01490451.2017.1309087>
- Hervé V, Junier T, Bindschedler S et al. Diversity and ecology of oxalotrophic bacteria. *World J Microbiol Biotechnol* 2016;32:1–7. <https://doi.org/10.1007/s11274-015-1982-3>
- Hervé V, Simon A, Randeoson F et al. Functional diversity of the litter-associated fungi from an oxalate-carbonate pathway ecosystem in Madagascar. *Microorganisms* 2021;9:1–12. <https://doi.org/10.3390/microorganisms9050985>
- Hicks Pries C, Angert A, Castanha C et al. Using respiration quotients to track changing sources of soil respiration seasonally and with experimental warming. *Biogeosciences* 2020;17:3045–55. <https://doi.org/10.5194/bg-17-3045-2020>
- Hokama S, Honma Y, Toma C et al. Oxalate-degrading *Enterococcus faecalis*. *Microbiol Immunol* 2000;44:235–40. <https://doi.org/10.1111/j.1348-0421.2000.tb02489.x>
- Hokama S, Toma C, Iwanaga M et al. Oxalate-degrading *Providencia rettgeri* isolated from human stools. *Internat J Urolog* 2005;12:533–8. <https://doi.org/10.1111/j.1442-2042.2005.01083.x>
- Holmes RP, Kennedy M. Estimation of the oxalate content of foods and daily oxalate intake. *Kidney Internat* 2000;57:1662–7. <https://doi.org/10.1046/j.1523-1755.2000.00010.x>
- Hontz D, Hensley J, Hiryak K et al. A copper(II) macrocycle complex for sensing biologically relevant organic anions in a competitive fluorescence assay: oxalate sensor or urate sensor? *ACS Omega* 2020;5:19469–77. <https://doi.org/10.1021/acsomega.0c01655>
- IPBES. *Summary for Policymakers of the Global Assessment Report on Biodiversity and Ecosystem Services of the Intergovernmental Science-Policy Platform on Biodiversity and Ecosystem Services*. Bonn, Germany: IPBES Secretariat, 2019.
- Ito H, Miura N, Masai M et al. Reduction of oxalate content of foods by the oxalate degrading bacterium, *Eubacterium lentum* WYH-1. *Internat J Urolog* 1996;3:31–34.
- Itoh H, Aita M, Nagayama A et al. Evidence of environmental and vertical transmission of *Burkholderia* symbionts in the oriental chinch bug, *Caveleius saccharivorus* (Heteroptera: blissidae). *Appl Environ Microb* 2014;80:5974–83. <https://doi.org/10.1128/AEM.01087-14>
- Janssen PH. Identifying the dominant soil bacterial taxa in libraries of 16S rRNA and 16S rRNA genes. *Appl Environ Microb* 2006;72:1719–28. <https://doi.org/10.1128/AEM.72.3.1719-1728.2006>
- Jarosz-Wilkolazka A, Grąz M. Organic acids production by white rot basidiomycetes in the presence of metallic oxides. *Can J Microbiol* 2006;52:779–85. <https://doi.org/10.1139/W06-032>
- Jenni B, Realini L, Aragno M et al. Taxonomy of non H<sub>2</sub>-lithotrophic, oxalate-oxidizing bacteria related to *Alcaligenes eutrophus*. *System Appl Microbiol* 1988;10:126–33. [https://doi.org/10.1016/S0723-2020\(88\)80026-2](https://doi.org/10.1016/S0723-2020(88)80026-2)
- Jiang T, Chen W, Cao L et al. Abundance, functional, and evolutionary analysis of oxalyl-coenzyme a decarboxylase in human microbiota. *Front Microbiol* 2020;23:672. <https://doi.org/10.3389/fmicb.2020.00672>
- Jones DL, Dennis PG, Owen AG et al. Organic acid behavior in soils—misconceptions and knowledge gaps. *Plant Soil* 2003;248:31–41.
- Jones DL, Edwards AC. Influence of sorption on the biological utilization of two simple carbon substrates. *Soil Biol Biochem* 1998;30:1895–902. [https://doi.org/10.1016/S0038-0717\(98\)00060-1](https://doi.org/10.1016/S0038-0717(98)00060-1)
- Just VJ, Stevenson CEM, Bowater L et al. A closed conformation of *Bacillus subtilis* oxalate decarboxylase *oxdc* provides evidence for the true identity of the active site. *J Biol Chem* 2004;279:19867–74. <https://doi.org/10.1074/jbc.M313820200>
- Kamthan A, Kamthan M, Kumar A et al. A calmodulin like EF hand protein positively regulates oxalate decarboxylase expression by interacting with E-box elements of the promoter. *Scient Rep* 2015;5:1–14. <https://doi.org/10.1038/srep14578> (?PMU?)
- Karabourniotis G, Horner HT, Bresta P et al. New insights into the functions of carbon-calcium inclusions in plants. *New Phytol* 2020;228:845–54. <https://doi.org/10.1111/nph.16763>
- Kathiara M, Wood DA, Evans CS. Detection and partial characterization of oxalate decarboxylase from *Agaricus bisporus*. *Mycolog Res* 2000;104:345–50. <https://doi.org/10.1017/S095375629900129X>
- Keevil BG, Thornton S. Quantification of urinary oxalate by liquid chromatography-tandem mass spectrometry with online weak anion exchange chromatography. *Clin Chem* 2006;52:2294–6. <https://doi.org/10.1373/clinchem.2006.075309>
- Kesarwani M, Azam M, Natarajan K et al. Oxalate decarboxylase from *Collybia velutipes*. Molecular cloning and its overexpression to confer resistance to fungal infection in transgenic tobacco and tomato. *J Biol Chem* 2000;275:7230–8. <https://doi.org/10.1074/jbc.275.10.7230>
- Khalil SKH, Azooz MA. Application of vibrational spectroscopy in identification of the composition of the urinary stones. *J Appl Sci Res* 2007;3:387–91.
- Khambata SR, Bhat JV. Studies on a new oxalate-decomposing bacterium, *Pseudomonas oxalaticus*. *J Bacteriol* 1953;66:505–7.
- Khammar N, Martin G, Ferro K et al. Use of the *frc* gene as a molecular marker to characterize oxalate-oxidizing bacterial abundance and diversity structure in soil. *J Microbiol Meth* 2009;76:120–7. <https://doi.org/10.1016/j.mimet.2008.09.020>
- Kikuchi Y, Meng XY, Fukatsu T. Gut symbiotic bacteria of the genus *Burkholderia* in the broad-headed bugs *Riptortus clavatus* and *Leptocoris chinensis* (Heteroptera: alydidae). *Appl Environ Microb* 2005;71:4035–43. <https://doi.org/10.1128/AEM.71.7.4035-4043.2005>
- Knutson DM, Hutchins AS, Cromack K. The association of calcium oxalate-utilizing *streptomyces* with conifer ectomycorrhizae. *Antonie Van Leeuwenhoek* 1980;46:611–9. <https://doi.org/10.1007/BF00394017>
- Koch M, Delmotte N, Ahrens CH et al. a link between arabinose utilization and oxalotrophy in *Bradyrhizobium japonicum*. *Appl Environ Microb* 2014;80:2094–101. <https://doi.org/10.1128/AEM.03314-13>
- Kost T, Stopnisek N, Agnoli K et al. Oxalotrophy, a widespread trait of plant-associated *Burkholderia* species, is involved in successful root colonization of lupin and maize by *Burkholderia phytofirmans*. *Front Microbiol* 2014;4:421. <https://doi.org/10.3389/fmicb.2013.00421>
- Kotani A, Ishikawa H, Shii T et al. Determination of oxalic acid in herbal medicines by semi-micro hydrophilic interaction liquid chromatography coupled with electrochemical detection. *Analyt Sci* 2023;39:441–6. <https://doi.org/10.1007/s44211-022-00245-w>



- Kumar V, Chattopadhyay A, Ghosh S *et al.* Improving nutritional quality and fungal tolerance in soya bean and grass pea by expressing an oxalate decarboxylase. *Plant Biotechnol J* 2016;14:1394–405. <https://doi.org/10.1111/pbi.12503>
- Kwak C, Jeong BC, Ku JH *et al.* Prevention of nephrolithiasis by *Lactobacillus* in stone-forming rats: a preliminary study. *Urolog Res* 2006;34:265–70. <https://doi.org/10.1007/s00240-006-0054-4>
- Labeda DP. In: Balows A, Trüper HG, Dworkin M, Harder W, Schleifer KH (eds.), *The Prokaryotes. A Handbook on the Biology of Bacteria: Ecophysiology, Isolation, Identification, Applications*, 2nd Edition, Springer-Verlag, 1992. (pp.1061–8).
- Lackner G, Peters EE, Helfrich EJ *et al.* Insights into the lifestyle of uncultured bacterial natural product factories associated with marine sponges. *P Natl Acad Sci USA* 2017;114:E347–56. <https://doi.org/10.1073/pnas.1616234114>.
- Lal R, Monger C, Nave L *et al.* the role of soil in regulation of climate. *Phil Trans Royal Soc B: Biol Sci* 2021;376:20210084. <https://doi.org/10.1098/rstb.2021.0084>
- Lang E, Schumann P, Adler S *et al.* *Azorbizobium oxalatiphilum* sp. nov., and emended description of the genus *Azorbizobium*. *Internat J System Evol Microbiol* 2013;63:1505–11. <https://doi.org/10.1099/ijs.0.045229-0>
- Lang E, Swiderski J, Stackebrandt E *et al.* Description of *ancylobacter oerskovii* sp. nov. and two additional strains of *ancylobacter polymorphus*. *Internat J System Evol Microbiol* 2008;58:1997–2002. <https://doi.org/10.1099/ijs.0.65666-0>
- Lang E, Swiderski J, Stackebrandt E *et al.* *Herminiimonas saxobidensis* sp. nov., isolated from a lichen-colonized rock. *Internat J System Evol Microbiol* 2007;57:2618–22. <https://doi.org/10.1099/ijs.0.65163-0>
- Lechmere-Oertel RG, Cowling RM, Kerley GIH. Landscape dysfunction and reduced spatial heterogeneity in soil resources and fertility in semi-arid succulent thicket. *South Africa Austral Ecol* 2005;30:615–24. <https://doi.org/10.1111/j.1442-9993.2005.01495.x>
- Lechmere-Oertel RG, Kerley GIH, Mills AJ *et al.* Litter dynamics across browsing-induced fenceline contrasts in succulent thicket. *South Africa South African J Bot* 2008;74:651–9. <https://doi.org/10.1016/j.sajb.2008.04.002>
- Lee SD, Kim ES, Roe JH *et al.* *Saccharothrix violacea* sp. nov., isolated from a gold mine cave, and *Saccharothrix albidocapillata* comb. nov. *Internat J System Evol Microbiol* 2000;50:1315–23. <https://doi.org/10.1099/00207713-50-3-1315>
- Lehner A, Meimoun P, Errakhi R *et al.* Toxic and signalling effects of oxalic acid—natural born killer or natural born protector? *Plant Signal Behav* 2008;3:746–8. <https://doi.org/10.4161/psb.3.9.6634>
- Lewanika TR, Reid SJ, Abratt VR *et al.* *Lactobacillus gasserii* Gasser AM63(T) degrades oxalate in a multistage continuous culture simulator of the human colonic microbiota. *FEMS Microbiol Ecol* 2007;61:110–20. <https://doi.org/10.1111/j.1574-6941.2007.00327>
- Li W, Zheng J, Chen M *et al.* Simultaneous determination of oxalate and citrate in urine and serum of calcium oxalate kidney stone rats by IP-RP LC-MS/MS. *J Chromat B* 2022;1208:123395. <https://doi.org/10.1016/j.jchromb.2022.123395>
- Liang X, Moomaw EW, Rollins JA. Fungal oxalate decarboxylase activity contributes to sclerotinia sclerotiorum early infection by affecting both compound appressoria development and function. *Molec Plant Pathol* 2015;16:825–36. <https://doi.org/10.1111/mpp.12239>
- Lillehoj EB, Smith FG. An oxalic acid decarboxylase of *myrothecium verrucaria*. *Arch Biochem Biophys* 1965;109:216–20.
- Liu Y, Zhang C, Li B *et al.* Extraction and determination of total and soluble oxalate in pulping and papermaking raw materials. *BioRes* 2015;10:4580–7.
- Lu H, Deng T, Cai Z *et al.* *Janthinobacterium violaceinigrum* sp. nov., *Janthinobacterium aquaticum* sp. nov. and *Janthinobacterium rivuli* sp. nov., isolated from a subtropical stream in China. *Internat J System Evol Microbiol* 2020;70:2719–25. <https://doi.org/10.1099/ijs.0.004097>
- Ma J, Ryan PR, Delhaize E. Aluminium tolerance in plants and the complexing role of organic acids. *Trends Plant Sci* 2001;6:273–8.
- Ma J, Zheng S, Matsumoto H *et al.* Detoxifying aluminium with buckwheat. *Nature* 1997;387:1044–5. <https://doi.org/10.1038/37518>
- Maddaloni M, Pascual DW. Isolation of oxalotrophic bacteria associated with *Varroa destructor* mites. *Lett Appl Microbiol* 2015;61:411–7. <https://doi.org/10.1111/lam.12486>
- Magro P, Marciano P, di Lenna P. Enzymatic oxalate decarboxylation in isolates of *sclerotinia sclerotiorum*. *FEMS Microbiol Lett* 1988;49:49–52. <https://doi.org/10.1111/j.1574-6968.1988.tb02680.x>
- Mäkelä M, Galkin S, Hatakka A *et al.* Production of organic acids and oxalate decarboxylase in lignin-degrading white rot fungi. *Enz Microb Technol* 2002;30:542–9. [https://doi.org/10.1016/S0141-0229\(02\)00012-1](https://doi.org/10.1016/S0141-0229(02)00012-1)
- Mäkelä MR, Hildén K, Hatakka A *et al.* Oxalate decarboxylase of the white-rot fungus *dichomitus squalens* demonstrates a novel enzyme primary structure and non-induced expression on wood and in liquid cultures. *Microbiology* 2009;155:2726–38. <https://doi.org/10.1099/mic.0.028860-0>
- Mäkelä MR, Hildén K, Lundell TK. Oxalate decarboxylase: biotechnological update and prevalence of the enzyme in filamentous fungi. *Appl Microbiol Biotechnol* 2010;87:801–14. <https://doi.org/10.1007/s00253-010-2650-z>
- Martin G, Guggiari M, Bravo D *et al.* Fungi, bacteria and soil pH: the oxalate-carbonate pathway as a model for metabolic interaction. *Environ Microbiol* 2012;14:2960–70. <https://doi.org/10.1111/j.1462-2920.2012.02862.x>
- Masiello CA, Gallagher ME, Randerson JT *et al.* Evaluating two experimental approaches for measuring ecosystem carbon oxidation state and oxidative ratio. *J Geophys Res: Biogeosci* 2008;113:1–9. <https://doi.org/10.1029/2007JG000534>
- Mehta A, Datta A. Oxalate decarboxylase from *Collybia velutipes*: purification, characterization, and cDNA cloning. *J Biol Chem* 1991;266:23548–53. [https://doi.org/10.1016/s0021-9258\(18\)54317-9](https://doi.org/10.1016/s0021-9258(18)54317-9)
- Micales JA. Localization and induction of oxalate decarboxylase in the brown-rot wood decay fungus *postia placenta*. *Internat Biodeterior Biodegrad* 1997;39:125–32. [https://doi.org/10.1016/S0964-8305\(97\)00009-7](https://doi.org/10.1016/S0964-8305(97)00009-7)
- Miller AW, Kohl KD, Dearing MD. The gastrointestinal tract of the white-throated woodrat (*Neotoma albigula*) harbors distinct consortia of oxalate-degrading bacteria. *Appl Environ Microb* 2014;80:1595–601. <https://doi.org/10.1128/AEM.03742-13>
- Mills AJ, Cowling RM. Below-ground carbon stocks in intact and transformed subtropical thicket landscapes in semi-arid South Africa. *J Arid Environ* 2010;74:93–100. <https://doi.org/10.1016/j.jaridenv.2009.07.002>
- Misiewicz B, Mencer D, Terzaghi W *et al.* Analytical methods for oxalate quantification: the ubiquitous organic anion. *Molecules* 2023;28:3206. <https://doi.org/10.3390/molecules28073206>
- Monger HC, Kraimer RA, Khresat SE *et al.* Sequestration of inorganic carbon in soil and groundwater. *Geology* 2015;43:375–8. <https://doi.org/10.1130/G36449.1>
- Morris SJ, Allen MF. Oxalate-metabolizing microorganisms in sagebrush steppe soil. *Biol Fertil Soils* 1994;18:255–9. <https://doi.org/10.1007/BF00647677>
- Moura AV, Silva AAR, Santo da Silva JD *et al.* Determination of ions in *Caenorhabditis elegans* by ion chromatography. *J Chromat B* 2022;1204:123312. <https://doi.org/10.1016/j.jchromb.2022.123312>
- Mu Y, Wu Y, Wang X *et al.* Determination of 10 organic acids in alcoholic products by ion chromatography-tandem mass spectrometry. *Chinese J Chromat* 2022;40:1128–35. <https://doi.org/10.3724/SP.J.1123.2022.01020>
- Mujinya BB, Mees F, Boeckx P *et al.* the origin of carbonates in termite mounds of the Lubumbashi area. *DR Congo Geoderma* 2011;165:95–105. <https://doi.org/10.1016/j.geoderma.2011.07.009>

- Müller H. Oxalsäure als kohlenstoffquelle für mikroorganismen. *Arch Mikrobiol* 1950;15:137–48. <https://doi.org/10.1007/BF00409694>
- Munir E, Yoon JJ, Tokimatsu T et al. a physiological role for oxalic acid biosynthesis in the wood-rotting basidiomycete *Fomitopsis palustris*. *P Natl Acad Sci USA* 2001;98:11126–30. <https://doi.org/10.1073/pnas.191389598>
- Naik VV, Patil NS, Aparadh VT et al. . Methodology in determination of oxalic acid in plant tissue: a comparative approach. *J Glob Trends Pharm Sci* 2014;5:1662–72. <https://www.researchgatenet/publication/260835371> .
- Nakata PA, He C. Oxalic acid biosynthesis is encoded by an operon in *Burkholderia glumae*. *FEMS Microbiol Lett* 2010;304:177–82. <https://doi.org/10.1111/j.1574-6968.2010.01895.x>
- Nakata PA. Advances in our understanding of calcium oxalate crystal formation and function in plants. *Plant Sci* 2003;164:901–9. [https://doi.org/10.1016/S0168-9452\(03\)00120-1](https://doi.org/10.1016/S0168-9452(03)00120-1)
- Nakata PA. The oxalic acid biosynthetic activity of *Burkholderia mallei* is encoded by a single locus. *Microbiol Res* 2011;166:531–8. <https://doi.org/10.1016/j.micres.2010.11.002>
- Noblitt SD, Schwandner FM, Hering SV et al. High-sensitivity microchip electrophoresis determination of inorganic anions and oxalate in atmospheric aerosols with adjustable selectivity and conductivity detection. *J Chromat A* 2009;1216:1503–10. <https://doi.org/10.1016/j.chroma.2008.12.084>
- Norton RA, Behan-Pelletier VM. Calcium carbonate and calcium oxalate as cuticular hardening agents in oribatid mites (Acari: oribatida). *Can J Zool* 1991;69:1504–11. <https://doi.org/10.1139/z91-210>
- Palmer M, Covington JK, Zhou E-M et al. *Thermophilic dehalococcoidia* with unusual traits shed light on an unexpected past. *ISME J* 2023;17:952–66. <https://doi.org/10.1038/s41396-023-01405-0>
- Palmieri F, Estoppey A, House GL et al. Oxalic acid, a molecule at the crossroads of bacterial-fungal interactions. *Adv Appl Microbiol* 2019;106:49–77. <https://doi.org/10.1016/bs.aambs.2018.10.001>
- Parsons RF, Attiwill PM, Uren NC et al. Calcium oxalate and calcium cycling in forest ecosystems. *Trees—Structure Function* 2022;36:531–6. <https://doi.org/10.1007/s00468-021-02226-4>
- Paul D, Bridges SM, Burgess SC et al. Complete genome and comparative analysis of the chemolithoautotrophic bacterium *oligotropha carboxidovorans* OM5. *BMC Genom* 2010;11:1–10. <https://doi.org/10.1186/1471-2164-11-511>
- PBES. 2019 Summary for policymakers of the global assessment report on biodiversity and ecosystem services. IPBES 7, Paris, 2019, Zenodo. <https://doi.org/10.5281/zenodo.3553579>
- Penzhorn BL, Olivier MC. A systematic check list of flowering plants collected in the Addo Elephant National Park. *Koedoe* 1974;17:121–136.
- Pimm S, Raven P. The State of the world's biodiversity. In Dasgupta P, Raven P, McIvor A (eds.), *Biological Extinction: New Perspectives*(pp.80–112). Cambridge: Cambridge University Press, 2019. <https://doi.org/10.1017/9781108668675.006>
- Plassard C, Fransson P, Navarro D et al. Exploring fungal biodiversity: organic acid production by 66 strains of filamentous fungi. *Fungal Biol Rev* 2009;23:30–39. <http://linkinghub.elsevier.com/retrieve/pii/S1749461309000177>
- Pons S, Bindschedler S, Sebag D et al. Biocontrolled soil nutrient distribution under the influence of an oxalogenic-oxalotrophic ecosystem. *Plant Soil* 2018;425:145–60. <https://doi.org/10.1007/s11104-018-3573-1>
- Postgate JR. A strain of *Desulfovibrio* able to use oxamate. *Archiv Mikrobiol* 1963;46:287–95. <https://doi.org/10.1007/BF00422189>
- Pourreza N, Lotfizadeh N, Golmohammadi H. Colorimetric sensing of oxalate based on its inhibitory effect on the reaction of Fe (III) with curcumin nanoparticles. *Spectrochim Acta Part A: Molec Biomolec Spectro* 2018;192:251–6. <https://doi.org/10.1016/j.saa.2017.11.003>
- Proia AD, Brinn NT. Identification of calcium oxalate crystals using alizarin red S stain. *Arch Pathol Lab Med* 1985;109:186–9. <https://www.scopus.com/record/display.uri?eid=2-s2.0-0021965558>
- Qi X, Zhang Y, Zhang Y et al. Vitamin B12 produced by *Cetobacterium somerae* improves host resistance against pathogen infection through strengthening the interactions within gut microbiota. *Microbiome* 2023;11:135. <https://doi.org/10.1186/s40168-023-01574-2>
- Ramírez C, Coronado J, Silva A et al. *Cetobacterium* is a major component of the microbiome of giant Amazonian fish (*Arapaima gigas*) in Ecuador. *Animals (Basel)* 2018;8:189. <https://doi.org/10.3390/ani8110189>
- Rehman H, Poch RM, Scarciglia F et al. a carbon-sink in a sacred forest: biologically-driven calcite formation in highly weathered soils in Northern Togo (West Africa). *Catena* 2021;198:105027. <https://doi.org/10.1016/j.catena.2020.105027>
- Ren Z, Pan C, Jiang L et al. Oxalate-degrading capacities of lactic acid bacteria in canine feces. *Vet Microbiol* 2011;152:368–73. <https://doi.org/10.1016/j.vetmic.2011.05.003>
- Rhaman MM, Fronczek FR, Powell DR et al. Colourimetric and fluorescent detection of oxalate in water by a new macrocycle-based dinuclear nickel complex: a remarkable red shift of the fluorescence band. *Dalton Trans* 2014;43:4618. <https://doi.org/10.1039/c3dt53467g>
- Robertson CF, Meyers PR. Oxalate utilisation is widespread in the actinobacterial genus *Kribbella*. *System Appl Microbiol* 2022;45:126373. <https://doi.org/10.1016/j.syapm.2022.126373>
- Rocha DP, Pinto GF, Silva SM et al. a multi-pumping flow system for spectrophotometric determination of oxalate in tea. *Microchem J* 2020;157:104938. <https://doi.org/10.1016/j.microc.2020.104938>
- Rojas-Molina I, Gutiérrez-Cortez E, Bah M et al. Characterization of calcium compounds in *Opuntia ficus indica* as a source of calcium for human diet. *J Chem* 2015;1:1–9. <https://doi.org/10.1155/2015/710328>
- Ros AB, Savage GP, Martin RJ et al. Oxalates in Oca (New Zealand yam) (*Oxalis tuberosa* Mol.). *J Agric Food Chem* 1999;47:5019–22. <https://doi.org/10.1021/jf990332r>
- Rowley MC, Estrada-Medina H, Tzec-Gamboa M et al. Moving carbon between spheres, the potential oxalate-carbonate pathway of *Brosimum alicastrum* Sw.; Moraceae. *Plant Soil* 2017;412:465–79. <https://doi.org/10.1007/s11104-016-3135-3>
- Rudnick MB, van Veen JA, de Boer W. Oxalic acid: a signal molecule for fungus-feeding bacteria of the genus *Collimonas*? *Environ Microbiol Rep* 2015;7:709–14. <https://doi.org/10.1111/1758-2229.12290>
- Sachs JD, Lafortune G, Fuller G et al. Implementing the SDG stimulus. *Sustainable Development Report 2023*. Paris: SDSN, Dublin: Dublin University Press, 2023.
- Sadaf H, Raza SI, Hassan SW. Role of gut microbiota against calcium oxalate. *Microb Pathogen* 2017;109:287–91. <https://doi.org/10.1016/j.micpath.2017.06.009>
- Şahin N, Gökler I, Tamer AÜ. Isolation, characterization and numerical taxonomy of novel oxalate-oxidizing bacteria. *J Microbiol* 2002;40:109–18. <https://www.academia.edu/download/39122700/0fcfd5080e8e53a69a000000.pdf>
- Şahin N, Gonzalez JM, Iizuka T et al. Characterization of two aerobic ultramicrobacteria isolated from urban soil and a description of *oxalicibacterium solurbis* sp. Nov *FEMS Microbiol Lett* 2010;307:25–29. <https://doi.org/10.1111/j.1574-6968.2010.01954.x>
- Şahin N. Oxalotrophic bacteria. *Res Microbiol* 2003;154:399–407. [https://doi.org/10.1016/S0923-2508\(03\)00112-8](https://doi.org/10.1016/S0923-2508(03)00112-8)
- Saleem H, Rehman Y. Arsenic respiration and detoxification by purple non-sulphur bacteria under anaerobic conditions. *Comp Rend Biol* 2019;342:101–7. <https://doi.org/10.1016/j.crv.2019.02.001>
- Sato S, Feltus FA, Iyer P et al. the first genome-level transcriptome of the wood-degrading fungus *phanerochaete chrysosporium* grown on red oak. *Curr Genet* 2009;55:273–96. <https://doi.org/10.1007/s00294-009-0243-0>
- Sato S, Liu F, Koc H et al. Expression analysis of extracellular proteins from *Phanerochaete chrysosporium* grown on different liquid and solid substrates. *Microbiology* 2007;153:3023–33. <https://doi.org/10.1099/mic.0.2006/000513-0>

- Savage GP, Mårtensson L. Comparison of the estimates of the oxalate content of taro leaves and corms and a selection of Indian vegetables following hot water, hot acid and in vitro extraction methods. *J Food Compos Anal* 2010;23:113–7. <https://doi.org/10.1016/j.jfca.2009.07.001>
- Savage GP, Vanhanen MSM, Ross AB. Effect of cooking on the soluble and insoluble oxalate content of some New Zealand foods. *J Food Compos Anal* 2000;13:201–6. <https://doi.org/10.1006/jfca.2000.0879>
- Schmalenberger A, Duran AL, Bray AW *et al.* Oxalate secretion by ectomycorrhizal *paxillus involutus* is mineral-specific and controls calcium weathering from minerals. *Scient Rep* 2015;5:1–14. <https://doi.org/10.1038/srep12187>
- Schmidt E, Obratzsova A, Davidson S *et al.* Identification of the anti-fungal peptide-containing symbiont of the marine sponge *Theonella swinhoei* as a novel  $\delta$ -proteobacterium, “*Candidatus Entotheonella palauensis*”. *Marine Biol* 2000;136:969–77. <https://doi.org/10.1007/s002270000273>
- Schmitt AD, Borrelli N, Ertlen D *et al.* Stable calcium isotope speciation and calcium oxalate production within beech tree (*Fagus sylvatica* L.) organs. *Biogeochemistry* 2018;137:197–217. <https://doi.org/10.1007/s10533-017-0411-0>
- Schneider K, Skovran E, Vorholt JA. Oxalyl-coenzyme a reduction to glyoxylate is the preferred route of oxalate assimilation in *Methylobacterium extorquens* AM1. *J Bacteriol* 2012;194:3144–55. <https://doi.org/10.1128/JB.00288-12>
- Seddon N, Chausson A, Berry P *et al.* Understanding the value and limits of nature-based solutions to climate change and other global challenges. *Phil Trans Roy Soc B: Biol Sci* 2020;375:20190120. <https://doi.org/10.1098/rstb.2019.0120>
- Shen Y, Luo X, Li H *et al.* Evaluation of a high-performance liquid chromatography method for urinary oxalate determination and investigation regarding the pediatric reference interval of spot urinary oxalate to creatinine ratio for screening of primary hyperoxaluria. *J Clin Lab Anal* 2021;35:1–9. <https://doi.org/10.1002/jcla.23870>
- Shi H, Li X, Li Y *et al.* Wild jujube-based fluorescent carbon dots for highly sensitive determination of oxalic acid. *RSC Adv* 2022;12:28545–52. <https://doi.org/10.1039/D2RA03780G>
- Shimada M, Akamtsu Y, Tokimatsu T *et al.* Possible biochemical roles of oxalic acid as a low molecular weight compound involved in brown-rot and white-rot wood decays. *J Biotechnol* 1997;53:103–13. [https://doi.org/10.1016/S0168-1656\(97\)01679-9](https://doi.org/10.1016/S0168-1656(97)01679-9)
- Shimazono H. Oxalic acid decarboxylase, a new enzyme from the mycelium of wood destroying fungi. *J Biochem* 1955;42:321–40. <https://doi.org/10.1093/oxfordjournals.jbchem.a126533>
- Sidhu H, Enatska L, Ogden S *et al.* Evaluating children in the Ukraine for colonization with the intestinal bacterium *Oxalobacter formigenes*, using a polymerase chain reaction-based detection system. *Molec Diagnost* 1997;2:89–97. [https://doi.org/10.1016/S1084-8592\(97\)80015-X](https://doi.org/10.1016/S1084-8592(97)80015-X)
- Sigma-Aldrich Co. *Oxalate Assay Kit Technical Bulletin*. Missouri, USA: St Louis, 2020, Available online at: <https://www.sigmaaldrich.com/deepweb/assets/sigmaaldrich/product/documents/955/358/mak315bul.pdf>
- Simon A, Hervé V, Al-Dourobi A *et al.* PhD thesis, *Highways and Subways: a Story of Fungi and Bacteria in Soils*. Switzerland: University of Neuchâtel, 2016.
- Sonke A, Trembath-Reichert E. Expanding the taxonomic and environmental extent of an underexplored carbon metabolism—oxalotrophy. *Front Microbiol* 2023;14:1–10. <https://doi.org/10.3389/fmicb.2023.1161937>
- Sörensen L. *A Spatial Analysis Approach to the Global Delineation of Dryland Areas of Relevance to the CBD Programme of Work on Dry and Subhumid Lands*. Cambridge: UNEP World Conservation Monitoring Centre, 2007.
- Starkey RL. Isolation of some bacteria which oxidize thiosulfate. *Soil Sci* 1935;39:197–220. <https://doi.org/10.1097/00010694-19350300-00004>
- Stone AT. Microbial metabolites and the reductive dissolution of manganese oxides: oxalate and pyruvate. *Geochim Cosmochim Acta* 1987;51:919–25. [https://doi.org/10.1016/0016-7037\(87\)90105-0](https://doi.org/10.1016/0016-7037(87)90105-0)
- Strobel BW, Kristensen F, Hansen HCB. Oxalate distribution in soils under rhubarb (*Rheum rhabonticum*). *Internat J Environ Anal Chem* 2004;84:909–17. <https://doi.org/10.1080/0306731042000268134>
- Ström L, Owen AG, Godbold DL *et al.* Organic acid behaviour in a calcareous soil: sorption reactions and biodegradation rates. *Soil Biol Biochem* 2001;33:2125–33. [https://doi.org/10.1016/S0038-0717\(01\)00146-8](https://doi.org/10.1016/S0038-0717(01)00146-8)
- Sun Q, Li J, Finlay RD *et al.* Oxalotrophic bacterial assemblages in the ectomycorrhizosphere of forest trees and their effects on oxalate degradation and carbon fixation potential. *Chem Geol* 2019;514:54–64. <https://doi.org/10.1016/j.chemgeo.2019.03.023>
- Suryavanshi MV, Bhute SS, Bharti N *et al.* Eubacterial diversity and oxalate metabolizing bacterial species (OMBS) reflect oxalate metabolism potential in *Odontotermes* gut. *J Pure Appl Microbiol* 2016;10:2035–44.
- Suzzi-Simmons A. Status of deforestation of Madagascar. *Global Ecol Conservat* 2023;42:e02389. <https://doi.org/10.1016/j.gecco.2023.e02389>
- Svedružić D, Jónsson S, Toyota CG *et al.* the enzymes of oxalate metabolism: unexpected structures and mechanisms. *Arch Biochem Biophys* 2005;433:176–92. <https://doi.org/10.1016/j.abb.2004.08.032>
- Tago K, Okubo T, Itoh H *et al.* Insecticide degrading *Burkholderia* symbionts of the stinkbug naturally occupy various environments of sugar cane fields in a southeast island of Japan. *Microb Environ* 2015;30:29–36. <https://doi.org/10.1264/jsm2.ME14124>
- Tamas I, Dedysh SN, Liesack W *et al.* Complete genome sequence of *Beijerinckia indica* subsp. *Indica*. *J Bacteriol* 2010;192:4532–3. <https://doi.org/10.1128/jb.00656-10>
- Tamer A, Aragno M. Isolement, caractérisation et essai d’identification de bactéries capables d’utiliser l’oxalate comme seule source de carbone et d’énergie. *Bull Soc Sci Natur Neuchâtel* 1980;103:91–104.
- Tamer AÜ, Aragno M, Şahin N. Isolation and characterization of a new type of aerobic, oxalic acid utilizing bacteria, and proposal of *oxalicibacterium flavum* gen. nov., sp. nov. *System. Appl Microbiol* 2002;25:513–9. <https://doi.org/10.1078/07232020260517643>
- Tamer AÜ. Ph.D. Thesis, *Oksalati Karbon Ve enerji Kaynagi Olarak kullanan bakteriler üzerinde Taksonomik Ve Fizyolojik Bir Arastirma*. Izmir-Turkey: Ege University, 1982.
- Tan ZY, Wang ET, Peng GX *et al.* Characterization of bacteria isolated from wild legumes in the north-western regions of China. *Intl J System Appl Microbiol* 1999;49:1457–69. <https://doi.org/10.1099/00207713-49-4-1457>
- Tanca A, Manghina V, Fraumene C *et al.* Metaproteogenomics reveals taxonomic and functional changes between cecal and fecal microbiota in mouse. *Front Microbiol* 2017;8:391. <https://doi.org/10.3389/fmicb.2017.00391>
- Tang M, Larson-Meyer DE, Liebman M. Effect of cinnamon and turmeric on urinary oxalate excretion, plasma lipids, and plasma glucose in healthy subjects. *Amer J Clin Nutr* 2008;87:1262–7. <https://doi.org/10.1093/ajcn/87.5.1262>
- Tavallali H, Deilamy-Rad G, Mosallanejad N. Development of a new colorimetric chemosensor for selective determination of urinary and vegetable oxalate concentration through an indicator-displacement assay (IDA) in aqueous media. *Food Technol Biotechnol* 2018;56:5726. <https://doi.org/10.17113/ftb.56.03.18.5726>
- Taylor LL, Quirk J, Thorley RMS *et al.* Enhanced weathering strategies for stabilizing climate and averting ocean acidification. *Nature Clim Change* 2016;6:402–6. <https://doi.org/10.1038/nclimate2882>
- Tooulakou G, Giannopoulos A, Nikolopoulos D *et al.* Alarm photosynthesis: calcium oxalate crystals as an internal CO<sub>2</sub> source in plants. *Plant Physiol* 2016;171:2577–85. <https://doi.org/10.1104/pp.16.00111>



- Turpault MP, Calvaruso C, Dincher M *et al.* Contribution of carbonates and oxalates to the calcium cycle in three beech temperate forest ecosystems with contrasting soil calcium availability. *Biogeochemistry* 2019;146:51–70. <https://doi.org/10.1007/s10533-019-00610-4>
- Turrone S, Bendazzoli C, Dipalo SC *et al.* Oxalate-degrading activity in *bifidobacterium animalis* subsp. *Lactis*: impact of acidic conditions on the transcriptional levels of the oxalyl coenzyme a (CoA) decarboxylase and formyl-CoA transferase genes. *Appl Environ Microb* 2010;76:5609–20. <https://doi.org/10.1128/AEM.00844-10>
- Turrone S, Vitali B, Bendazzoli C *et al.* Oxalate consumption by lactobacilli: evaluation of oxalyl-CoA decarboxylase and formyl-CoA transferase activity in *Lactobacillus acidophilus*. *J Appl Microbiol* 2007;103:1600–9. <https://doi.org/10.1111/j.1365-2672.2007.03388>
- UN General Assembly 2015 Transforming our world: the 2030 Agenda for Sustainable Development. A/RES/70/1.
- Urakami T, Komagata K. Characterization and identification of methanol-utilizing *hyphomicrobium* strains and a comparison with species of *hyphomonas* and *rhodomicrobium*. *J Gen Appl Microbiol* 1987;33:521–42. <https://doi.org/10.2323/jgam.33.521>
- Uren NC. Calcium oxalate in soils, its origins and fate—a review. *Soil Res* 2018;56:443–50.
- Vaisey EB, Cheldelin VH, Newburgh RW. Formate oxidation by an obligately parasitic fungus *tilletia contraversa*. *Arch Biochem Biophys* 1961;95:63–65. [https://doi.org/10.1016/0003-9861\(61\)90108-4](https://doi.org/10.1016/0003-9861(61)90108-4)
- Van Hees PAW, Jones D, Nyberg L *et al.* Modelling low molecular weight organic acid dynamics in forest soils. *Soil Biol Biochem* 2005;37:517–31. <https://doi.org/10.1016/j.soilbio.2004.08.014>
- van Hees PAW, Jones DL, Godbold DL. Biodegradation of low molecular weight organic acids in coniferous forest podzolic soils. *Soil Biol Biochem* 2002;34:1261–72. [https://doi.org/10.1016/S0038-0717\(02\)00068-8](https://doi.org/10.1016/S0038-0717(02)00068-8)
- van Luijk G, Cowling RM, Riksen MJPM. *et al.* Hydrological implications of desertification: degradation of South African semi-arid subtropical thicket. *J Arid Environ* 2013;91:14–21. <https://doi.org/10.1016/j.jaridenv.2012.10.022>
- Verra. 2019 AFOLU Non-Permanence Risk Tool. Verified Carbon Standard. [https://verra.org/wp-content/uploads/AFOLU\\_Non-Permanence\\_Risk\\_Tool\\_v4.0.pdf](https://verra.org/wp-content/uploads/AFOLU_Non-Permanence_Risk_Tool_v4.0.pdf) (28 July 2023, date last accessed).
- Verrecchia EP, Brissant O, Cailleau G. The oxalate-carbonate pathway in soil carbon storage: the role of fungi and oxalotrophic bacteria. *Fungi Biogeochem Cycles* 2006;24:289–310. <https://doi.org/10.1017/CBO9780511550522.013>
- Verrecchia EP, Dumont J-L, Verrecchia KE. Role of calcium oxalate biomineralization by fungi in the formation of calcretes; a case study from Nazareth. *Israel J Sediment Res* 1993;63:1000–6.
- Verrecchia EP, Dumont J-L. a biogeochemical model for chalk alteration by fungi in semiarid environments. *Biogeochemistry* 1996;35:447–70.
- Verrecchia EP. Litho-diagenetic implications of the calcium oxalate-carbonate biogeochemical cycle in semiarid Calcretes, Nazareth, Israel. *Geomicrobiol J* 1990;8:87–99.
- Vlok JHJ, Euston-Brown DIW, Cowling RM. Acocks' Valley Bushveld 50 years on: new perspectives on the delimitation, characterisation and origin of subtropical thicket vegetation. *S. Afr. J. Bot* 2003;69:27–51.
- Voronina E, Sidorova I. Rhizosphere, mycorrhizosphere and hyphosphere as unique niches for soil-inhabiting bacteria and microfungi. In *Advances in PGPR Research*, London, UK: CABI, 2017, pp. 165–86. <https://doi.org/10.1079/9781786390325.0165>
- Vylkova S. Environmental pH modulation by pathogenic fungi as a strategy to conquer the host. *PLoS Pathogen* 2017;13:e1006149. <https://doi.org/10.1371/journal.ppat.1006149>
- Watanabe T, Hattori T, Tengku S *et al.* Purification and characterization of NAD-dependent formate dehydrogenase from the white-rot fungus *ceriporiopsis subvermisporea* and a possible role of the enzyme in oxalate metabolism. *Enzyme Microb Technol* 2005;37:68–75. <https://doi.org/10.1016/j.enzymtec.2005.01.032>
- Wayne LG, Kubica GP. In: Krieg NR, Holt JG (eds.). *Bergey's Manual of Systematic Bacteriology*, Vol. 2. Baltimore: Lippincott-Williams & Wilkins, 1986, 1436–57.
- Weber OB, Baldani VLD, Teixeira KDS *et al.* Isolation and characterization of diazotrophic bacteria from banana and pineapple plants. *Plant Soil* 1999;210:103–13. <https://doi.org/10.1023/A:1004623523179>
- Weese JS, Weese HE, Yuricek L *et al.* Oxalate degradation by intestinal lactic acid bacteria in dogs and cats. *Vet Microbiol* 2004;101:161–6. <https://doi.org/10.1016/j.vetmic.2004.03.017>
- WEF. *Winning the Race to Net Zero: the CEO Guide to Climate Advantage*. World Economic Forum in Collaboration with Boston Consulting Group. 2022, [https://www3.weforum.org/docs/WEF\\_Winning\\_the\\_Race\\_to\\_Net\\_Zero\\_2022.pdf](https://www3.weforum.org/docs/WEF_Winning_the_Race_to_Net_Zero_2022.pdf)
- Wemheuer F, Taylor JA, Daniel R *et al.* Tax4Fun2: prediction of habitat-specific functional profiles and functional redundancy based on 16S rRNA gene sequences. *Environ Microb* 2020;15:11. <https://doi.org/10.1186/s40793-020-00358-7>
- Williams B, Kabbage M, Kim H-J *et al.* Tipping the balance: *sclerotinia sclerotiorum* secreted oxalic acid suppresses host defenses by manipulating the host redox environment. *PLoS Pathol* 2011;7:e1002107. <https://doi.org/10.1371/journal.ppat.1002107>
- Wu X, Spencer S, Gushgari-Doyle S *et al.* Culturing of “unculturable” subsurface microbes: natural organic carbon source fuels the growth of diverse and distinct bacteria from groundwater. *Front Microbiol* 2020;11:3171. <https://doi.org/10.1101/2020.05.01.073353>
- Xie Q, Wang Y, Huang Y *et al.* Description of *lentzea flaviverrucosa* sp. nov. and transfer of the type strain of *saccharothrix aerocolonigenes* subsp. *Staurosporea* to *lentzea albida*. *Internat J System Evolut Microbiol* 2002;52:1815–20. <https://doi.org/10.1099/00207713-52-5-1815>
- Xu HW, Ji XM, He ZH *et al.* Oxalate accumulation and regulation is independent of glycolate oxidase in rice leaves. *J Exp Bot* 2006;57:1899–908. <https://doi.org/10.1093/jxb/erj131>
- Xu Q, Li K, Ruan Y *et al.* Distinct response patterns of soil bacteria to oxalate imply their role in buffering soil acidification: evidence from red soils with long-term fertilisation regimes. *Land Degrad Develop* 2019;30:1632–41. <https://doi.org/10.1002/ldr.3353>
- Xu Y, Wu M, Zhang J *et al.* Cloning and molecular characterization of CmOxd3 coding for oxalate decarboxylase in the mycoparasite *coniothyrium minitans*. *J Fungi* 2022;8:1304. <https://doi.org/10.3390/jof8121304>
- Zaitsev GM, Tsitko IV, Rainey FA *et al.* New aerobic ammonium-dependent obligately oxalotrophic bacteria: description of *ammoniphilus oxalaticus* gen. nov., sp. nov. and *ammoniphilus oxalivorans* gen. nov., sp. nov. *Internat J System Evolut Microbiol* 1998;48:151–63. <https://doi.org/10.1099/00207713-48-1-151>
- Zhai Q-Z, Zhang X-X, Liu Q-Z. Catalytic kinetic spectrophotometry for the determination of trace amount of oxalic acid in biological samples with oxalic acid–rhodamine B–potassium dichromate system. *Spectrochim Acta Part A: Molec Biomolec Spectro* 2006;65:1–4. <https://doi.org/10.1016/j.saa.2005.07.080>
- Zhai Q-Z, Zhang X-X, Liu Q-Z. Spectrophotometric determination of trace oxalic acid with zirconium (IV)-dibromochloroarsenazo complex. *Bull Chem Soc Ethiopia* 2007;21:297–301. <https://doi.org/10.4314/bcse.v21i2.21210>
- Zhai Q-Z. Determination of trace amount of oxalic acid with zirconium(IV)-(DBS-arsenazo) by spectrophotometry. *Spectrochim Acta Part A: Molec Biomolec Spectro* 2008;71:332–5. <https://doi.org/10.1016/j.saa.2007.12.026>
- Zhang L, Wang MX, Li H *et al.* Mobilization of inorganic phosphorus from soils by ectomycorrhizal fungi. *Pedosphere* 2014;24:683–9. [https://doi.org/10.1016/S1002-0160\(14\)60054-0](https://doi.org/10.1016/S1002-0160(14)60054-0)



- Zhang S, Planavsky NJ, Katchinoff J *et al.* River chemistry constraints on the carbon capture potential of surficial enhanced rock weathering. *Limnol Oceanogr* 2022;67:S148–57. <https://doi.org/10.1002/lno.12244>
- Zhang X, Zhang L, Zou X *et al.* Semi-quantitative analysis of microbial production of oxalic acid by montmorillonite sorption and ATR-IR. *Appl Clay Sci* 2018;162:518–23. <https://doi.org/10.1016/j.clay.2018.07.006>
- Zhu CX, Hong F. Induction of an oxalate decarboxylase in the filamentous fungus *Trametes versicolor* by addition of inorganic acids. *Appl Biochem Biotechnol* 2010;160:655–64. <https://doi.org/10.1007/s12010-009-8571-6>
- Zuo G, Jiang X, Liu H *et al.* A novel urinary oxalate determination method via a catalase model compound with oxalate oxidase. *Analy Meth* 2010;2:254–8. <https://doi.org/10.1039/B9AY00247B>
